# Supplementary material for: Impact of the TCR Signal on Regulatory T Cell Homeostasis, Function, and Trafficking
Source: PubMed Central journal article supplement (PMC2719063; doi:10.1371/journal.pone.0006580), 2009-08-11
Supplement: pone.0006580.s003.pdf [file pone.0006580.s003.pdf]

Table S1A

| Symbol        | GeneID | Treg fold change (log <sub>2</sub> ) | B statistic | Description                                                                         |
|---------------|--------|--------------------------------------|-------------|-------------------------------------------------------------------------------------|
| Egr1          | 13653  | -1.92                                | 14.83       | early growth response 1                                                             |
| Cd83          | 12522  | -1.81                                | 11.96       | CD83 antigen                                                                        |
| Egr3          | 13655  | -1.78                                | 26.1        | early growth response 3                                                             |
| Myb           | 17863  | -1.6                                 | 10.67       | myeloblastosis oncogene                                                             |
| 2610204G07Rik | 72468  | -1.54                                | 17.97       | RIKEN cDNA 2610204G07 gene                                                          |
| Tnfrsf4       | 22163  | -1.47                                | 10.28       | tumor necrosis factor receptor superfamily, member 4                                |
| Gpm6b         | 14758  | -1.47                                | 8.11        | glycoprotein m6b                                                                    |
| Egr2          | 13654  | -1.45                                | 16.18       | early growth response 2                                                             |
| Bmyc          | 107771 | -1.45                                | 17.98       | brain expressed myelocytomatosis oncogene                                           |
| Rad511        | 19363  | -1.44                                | 14.73       | RAD51-like 1 (S. cerevisiae)                                                        |
| 2610042L04Rik | 67055  | -1.44                                | 3.54        | RIKEN cDNA 2610042L04 gene                                                          |
| Nrn1          | 68404  | -1.4                                 | 13.93       | neuritin 1                                                                          |
| Nr4a1         | 15370  | -1.39                                | 9.54        | nuclear receptor subfamily 4, group A, member 1                                     |
| C80638        | 97086  | -1.36                                | 10.2        | expressed sequence C80638                                                           |
| 1300007C21Rik | 67527  | -1.32                                | -1.59       | RIKEN cDNA 1300007C21 gene                                                          |
| Dusp4         | 319520 | -1.3                                 | 12.15       | dual specificity phosphatase 4                                                      |
| Cybb          | 13058  | -1.28                                | 15.71       | cytochrome b-245, beta polypeptide                                                  |
| Gsto1         | 14873  | -1.22                                | 10.95       | glutathione S-transferase omega 1                                                   |
| Tnfrsf9       | 21942  | -1.21                                | 17.08       | tumor necrosis factor receptor superfamily, member 9                                |
| Pdcd1         | 18566  | -1.2                                 | 12.62       | programmed cell death 1                                                             |
| A430093F15Rik | 403202 | -1.2                                 | 17.01       | RIKEN cDNA A430093F15 gene                                                          |
| Tnfrsf11      | 21943  | -1.19                                | 10.29       | tumor necrosis factor (ligand) superfamily, member 11                               |
| 1700001E04Rik | 75438  | -1.18                                | 11.91       | RIKEN cDNA 1700001E04 gene                                                          |
| Ctse          | 13034  | -1.15                                | -2.98       | cathepsin E                                                                         |
| H2afz         | 51788  | -1.14                                | 15.24       | H2A histone family, member Z                                                        |
| Ces2          | 234671 | -1.13                                | 7.97        | carboxylesterase 2                                                                  |
| Zfp361        | 12192  | -1.12                                | 18.99       | zinc finger protein 36, C3H type-like 1                                             |
| Tiam1         | 21844  | -1.1                                 | 14.97       | T-cell lymphoma invasion and metastasis 1                                           |
| Samsn1        | 67742  | -1.1                                 | 9.9         | SAM domain, SH3 domain and nuclear localisation signals, 1                          |
| Nxf           | 225872 | -1.1                                 | 9.01        | bHLH-PAS type transcription factor NXF                                              |
| Gsta4         | 14860  | -1.08                                | 11.42       | glutathione S-transferase, alpha 4                                                  |
| 2310001H17Rik | 76432  | -1.08                                | 17.92       | RIKEN cDNA 2310001H17 gene                                                          |
| Hod           | 74318  | -1.07                                | 12.47       | homeobox only domain                                                                |
| Ptger2        | 19217  | -1.06                                | 13.4        | prostaglandin E receptor 2 (subtype EP2)                                            |
| Hmgn3         | 94353  | -1.05                                | 4.65        | high mobility group nucleosomal binding domain 3                                    |
| Tieg1         | 21847  | -1.03                                | 9.28        | TGFβ inducible early growth response 1                                              |
| C030046G05    | 327885 | -1.03                                | 9.93        | hypothetical protein C030046G05                                                     |
| Rgs9          | 19739  | -1.02                                | 16.1        | regulator of G-protein signaling 9                                                  |
| Irf4          | 16364  | -1.02                                | 11.7        | interferon regulatory factor 4                                                      |
| H2-Aa         | 14960  | -1.02                                | 3.83        | histocompatibility 2, class II antigen A, alpha                                     |
| Dusp1         | 19252  | -1.01                                | 13.76       | dual specificity phosphatase 1                                                      |
| Rasip1        | 69903  | -0.98                                | 13.25       | Ras interacting protein 1                                                           |
| Cd200         | 17470  | -0.98                                | 11.32       | Cd200 antigen                                                                       |
| 2310067E08Rik | 71946  | -0.98                                | 11.7        | RIKEN cDNA 2310067E08 gene                                                          |
| Bcl2a1b       | 12045  | -0.97                                | 5.65        | B-cell leukemia/lymphoma 2 related protein A1b                                      |
| 4930555G01Rik | 108978 | -0.97                                | 10.81       | RIKEN cDNA 4930555G01 gene                                                          |
| Galnt14       | 71685  | -0.96                                | 10.08       | UDP-N-acetyl-alpha-D-galactosamine:polypeptide N-acetylgalactosaminyltransferase 14 |
| Fcer2a        | 14128  | -0.96                                | 15.48       | Fc receptor, IgE, low affinity II, alpha polypeptide                                |
| Ephx1         | 13849  | -0.96                                | 7.73        | epoxide hydrolase 1, microsomal                                                     |
| Ptprs         | 19280  | -0.95                                | 7.06        | protein tyrosine phosphatase, receptor type, S                                      |
| Tacstd1       | 17075  | -0.94                                | 13.67       | tumor-associated calcium signal transducer 1                                        |
| Cd44          | 12505  | -0.94                                | 16.78       | CD44 antigen                                                                        |
| Blink         | 17060  | -0.94                                | 5.14        | B-cell linker                                                                       |
| Bcl2a1d       | 12047  | -0.94                                | 7.11        | B-cell leukemia/lymphoma 2 related protein A1d                                      |
| Man1c1        | 230815 | -0.92                                | 14.32       | mannosidase, alpha, class 1C, member 1                                              |
| Bcl2a1a       | 12044  | -0.92                                | 7.09        | B-cell leukemia/lymphoma 2 related protein A1a                                      |
| Aicam         | 11658  | -0.92                                | 11.81       | activated leukocyte cell adhesion molecule                                          |
| 2300009N04Rik | 69477  | -0.92                                | 11.12       | RIKEN cDNA 2300009N04 gene                                                          |
| Scd1          | 20249  | -0.91                                | 7.65        | stearoyl-Coenzyme A desaturase 1                                                    |
| Kif27         | 75050  | -0.91                                | -3.11       | kinesin family member 27                                                            |
| Sh3gl3        | 20408  | -0.9                                 | 8.16        | SH3-domain GRB2-like 3                                                              |
| Penk1         | 18619  | -0.9                                 | 2.04        | preproenkephalin 1                                                                  |
| Itgae         | NA     | -0.9                                 | 8.21        | Mus musculus integrin, alpha E, epithelial-associated (Itgae), mRNA.                |
| BC022623      | 224093 | -0.9                                 | 3.43        | cDNA sequence BC022623                                                              |
| Tox           | 252838 | -0.89                                | 8.8         | thymocyte selection-associated HMG box gene                                         |
| Swap70        | 20947  | -0.89                                | 13.65       | SWAP complex protein                                                                |
| Eno3          | 13808  | -0.89                                | 12.6        | enolase 3, beta muscle                                                              |
| Stmn1         | 16765  | -0.88                                | 2.12        | stathmin 1                                                                          |
| Rec8L1        | 56739  | -0.88                                | 7.62        | REC8-like 1 (yeast)                                                                 |
| Gucy1a3       | 60596  | -0.88                                | 11.77       | guanylate cyclase 1, soluble, alpha 3                                               |
| Cyfp1         | 20430  | -0.88                                | 16.83       | cytoplasmic FMR1 interacting protein 1                                              |
| 1810037B05Rik | 69169  | -0.88                                | 15.13       | RIKEN cDNA 1810037B05 gene                                                          |
| Nt5e          | 23959  | -0.87                                | 3.66        | 5' nucleotidase, ecto                                                               |
| Twsg1         | 65960  | -0.86                                | 6.64        | twisted gastrulation homolog 1 (Drosophila)                                         |
| Serpina3g     | 20715  | -0.86                                | 7.7         | serine (or cysteine) proteinase inhibitor, clade A, member 3G                       |
| Mmd           | 67468  | -0.86                                | 6.62        | monocyte to macrophage differentiation-associated                                   |
| Itgae         | 16407  | -0.86                                | 14.33       | integrin, alpha E, epithelial-associated                                            |
| Rgs10         | 67865  | -0.85                                | 13.19       | regulator of G-protein signalling 10                                                |
| Wee1          | 22390  | -0.84                                | 4.72        | wee 1 homolog (S. pombe)                                                            |
| Lmo2          | 16909  | -0.84                                | 8.13        | LIM domain only 2                                                                   |
| Kif11         | 16551  | -0.84                                | 0.1         | kinesin family member 11                                                            |
| BC023488      | 237221 | -0.84                                | 8.48        | cDNA sequence BC023488                                                              |
| A430109M19Rik | 77935  | -0.84                                | 5.23        | RIKEN cDNA A430109M19 gene                                                          |
| Tcte1l        | 67117  | -0.83                                | 9.18        | t-complex-associated-testis-expressed 1-like                                        |
| Stx11         | 74732  | -0.83                                | 7.6         | syntaxin 11                                                                         |
| Nrp1          | 18186  | -0.83                                | 11.21       | neuropilin 1                                                                        |
| 1110032F04Rik | 68725  | -0.83                                | 7.72        | RIKEN cDNA 1110032F04 gene                                                          |
| 1110020C13Rik | 66151  | -0.83                                | 8.37        | RIKEN cDNA 1110020C13 gene                                                          |
| Ndg2          | 103172 | -0.82                                | 7.29        | Nur77 downstream gene 2                                                             |
| Cybb          | 13058  | -0.82                                | 7.89        | cytochrome b-245, beta polypeptide                                                  |

Table S1A

|               |        |       |       |                                                                                 |
|---------------|--------|-------|-------|---------------------------------------------------------------------------------|
| 2810465F10Rik | 78771  | -0.82 | 8.64  | RIKEN cDNA 2810465F10 gene                                                      |
| Ndg1          | 368204 | -0.81 | 11.42 | Nur77 downstream gene 1                                                         |
| Hif1a         | 15251  | -0.81 | 5.33  | hypoxia inducible factor 1, alpha subunit                                       |
| Cr2           | 12902  | -0.81 | 10.48 | complement receptor 2                                                           |
| A130034K24Rik | 319774 | -0.81 | 11.36 | RIKEN cDNA A130034K24 gene                                                      |
| Odc1          | 18263  | -0.8  | 4.35  | ornithine decarboxylase, structural 1                                           |
| D16Bwg1543e   | 52910  | -0.8  | 9.01  | DNA segment, Chr 16, Brigham & Women's Genetics 1543 expressed                  |
| C230027N18Rik | 330940 | -0.8  | 0.19  | RIKEN cDNA C230027N18 gene                                                      |
| 4732472107Rik | 271844 | -0.8  | 10.39 | RIKEN cDNA 4732472107 gene                                                      |
| Zfpn1a2       | 22779  | -0.79 | 13.56 | zinc finger protein, subfamily 1A, 2 (Helios)                                   |
| Zfp3611       | 12192  | -0.79 | 7.46  | zinc finger protein 36, C3H type-like 1                                         |
| Src           | 20779  | -0.79 | 7.46  | Rous sarcoma oncogene                                                           |
| Scd2          | 20250  | -0.79 | 13.03 | stearoyl-Coenzyme A desaturase 2                                                |
| Itgae         | NA     | -0.79 | 12.81 | Mus musculus integrin, alpha E, epithelial-associated (Itgae), mRNA.            |
| D930040M24Rik | 320858 | -0.79 | -4.42 | RIKEN cDNA D930040M24 gene                                                      |
| Anxa2         | 12306  | -0.79 | 0.83  | annexin A2                                                                      |
| 4631408O11Rik | 66693  | -0.79 | 6.92  | RIKEN cDNA 4631408O11 gene                                                      |
| Nrp           | NA     | -0.78 | 11.52 | Mus musculus neuropilin (Nrp), mRNA.                                            |
| Itgae         | NA     | -0.78 | 11.15 | Mus musculus integrin, alpha E, epithelial-associated (Itgae), mRNA.            |
| Inpp5f        | 101490 | -0.78 | 8.76  | inositol polyphosphate-5-phosphatase F                                          |
| Ebf1          | 13591  | -0.78 | 0.54  | early B-cell factor 1                                                           |
| Cst7          | 13011  | -0.78 | 12.08 | cystatin F (leukocystatin)                                                      |
| Cd79b         | NA     | -0.78 | 12.4  | Mus musculus CD79B antigen (Cd79b), mRNA.                                       |
| Ccr6          | 12458  | -0.78 | 3.9   | chemokine (C-C motif) receptor 6                                                |
| Bcl2a1c       | 12046  | -0.78 | 0.21  | B-cell leukemia/lymphoma 2 related protein A1c                                  |
| Axl           | 26362  | -0.78 | 9.51  | AXL receptor tyrosine kinase                                                    |
| Swap70        | 20947  | -0.77 | 8.07  | SWAP complex protein                                                            |
| Hivep3        | 16656  | -0.77 | 10.3  | human immunodeficiency virus type I enhancer binding protein 3                  |
| Hist1h2an     | 319170 | -0.77 | 0.74  | histone 1, H2an                                                                 |
| 4930431P03Rik | 73895  | -0.77 | 10.38 | RIKEN cDNA 4930431P03 gene                                                      |
| 4732460K03Rik | 58894  | -0.77 | 11.8  | RIKEN cDNA 4732460K03 gene                                                      |
| Mef2c         | 17260  | -0.76 | 6.06  | myocyte enhancer factor 2C                                                      |
| Itgb1         | 16412  | -0.76 | 2.48  | integrin beta 1 (fibronectin receptor beta)                                     |
| Dst           | NA     | -0.76 | 3.62  | Mus musculus dystonin (Dst), mRNA.                                              |
| Cxcr3         | 12766  | -0.76 | 1.93  | chemokine (C-X-C motif) receptor 3                                              |
| Cks2          | 66197  | -0.76 | 1.61  | CDC28 protein kinase regulatory subunit 2                                       |
| Bhlhb2        | 20893  | -0.76 | 9.63  | basic helix-loop-helix domain containing, class B2                              |
| BC003324      | 80291  | -0.76 | 9.39  | cDNA sequence BC003324                                                          |
| Rad51         | 19361  | -0.75 | -1.54 | RAD51 homolog (S. cerevisiae)                                                   |
| Noxa1         | 241275 | -0.75 | 16.22 | NADPH oxidase activator 1                                                       |
| Lag3          | 16768  | -0.75 | 6.17  | lymphocyte-activation gene 3                                                    |
| Dnmt3a        | 13435  | -0.75 | 0.93  | DNA methyltransferase 3A                                                        |
| D930021L15Rik | 319420 | -0.75 | 0.98  | RIKEN cDNA D930021L15 gene                                                      |
| Cd79b         | 15985  | -0.75 | 7.94  | CD79B antigen                                                                   |
| Ccna2         | 12428  | -0.75 | -0.54 | cyclin A2                                                                       |
| A1324046      | 380795 | -0.75 | -1.52 | expressed sequence A1324046                                                     |
| Irf5          | 27056  | -0.74 | 6.62  | interferon regulatory factor 5                                                  |
| H2-Ab1        | 14961  | -0.74 | 1.4   | histocompatibility 2, class II antigen A, beta 1                                |
| 8030462D06Rik | 77174  | -0.74 | 15.38 | RIKEN cDNA 8030462D06 gene                                                      |
| 5031439A09Rik | 68151  | -0.74 | 4.08  | RIKEN cDNA 5031439A09 gene                                                      |
| 1110060M21Rik | 66208  | -0.74 | 6.69  | RIKEN cDNA 1110060M21 gene                                                      |
| IGHD          | NA     | -0.73 | 6.04  | Part of the mouse gene for delta-immunoglobulin (CH1 domain).                   |
| Glrx1         | 93692  | -0.73 | 5.87  | glutaredoxin 1 (thioltransferase)                                               |
| Cd81          | 12520  | -0.73 | 6.17  | CD 81 antigen                                                                   |
| 9430025M21Rik | 77300  | -0.73 | 13.78 | RIKEN cDNA 9430025M21 gene                                                      |
| 0610010E21Rik | 68332  | -0.73 | 6.49  | RIKEN cDNA 0610010E21 gene                                                      |
| Cks1          | 54124  | -0.72 | -2.32 | CDC28 protein kinase 1                                                          |
| Acate2        | 56360  | -0.72 | 4.54  | acyl-Coenzyme A thioesterase 2, mitochondrial                                   |
| A630026H08Rik | NA     | -0.72 | 7.92  | Mus musculus RIKEN cDNA A630026H08 gene (A630026H08Rik), mRNA.                  |
| Serpinc1      | 11905  | -0.71 | -1.72 | serine (or cysteine) proteinase inhibitor, clade C (antithrombin), member 1     |
| Rog           | 58206  | -0.71 | -0.54 | repressor of GATA                                                               |
| LOC56304      | 56304  | -0.71 | 1.26  | recombinant antineuraminidase single chain Ig VH and VL domains                 |
| E130308A19Rik | 230259 | -0.71 | 7.97  | RIKEN cDNA E130308A19 gene                                                      |
| Casp4         | 12363  | -0.71 | 7.24  | caspase 4, apoptosis-related cysteine protease                                  |
| Tank          | NA     | -0.7  | 8.1   | Mus musculus TRAF family member-associated Nf-kappa B activator (Tank), mRNA.   |
| Slc7a10       | 53896  | -0.7  | 5.72  | solute carrier family 7 (cationic amino acid transporter, y+ system), member 10 |
| Igk-C         | 16071  | -0.7  | -3.41 | immunoglobulin kappa chain, constant region                                     |
| Arhgap20      | 244867 | -0.7  | 9.2   | Rho GTPase activating protein 20                                                |
| Apobec2       | 11811  | -0.7  | -0.99 | apolipoprotein B editing complex 2                                              |
| Trpm1         | 17364  | -0.69 | 11.3  | transient receptor potential cation channel, subfamily M, member 1              |
| Rabgap1l      | 29809  | -0.69 | 7.1   | RAB GTPase activating protein 1-like                                            |
| Nr4a2         | 18227  | -0.69 | 9.89  | nuclear receptor subfamily 4, group A, member 2                                 |
| Kns17         | 209737 | -0.69 | -1.13 | kinesin-like 7                                                                  |
| Hist1h2ah     | 319168 | -0.69 | 0.61  | histone 1, H2ah                                                                 |
| H2-Oa         | 15001  | -0.69 | 5.99  | histocompatibility 2, O region alpha locus                                      |
| H2-Ab1        | 14961  | -0.69 | 0.67  | histocompatibility 2, class II antigen A, beta 1                                |
| Gnpnat1       | 54342  | -0.69 | 5.97  | glucosamine-phosphate N-acetyltransferase 1                                     |
| D3Ucla1       | 28146  | -0.69 | 3.49  | DNA segment, Chr 3, University of California at Los Angeles 1                   |
| Zfp3611       | 12192  | -0.68 | 4.33  | zinc finger protein 36, C3H type-like 1                                         |
| Sh3md2        | NA     | -0.68 | 2.48  | Mus musculus SH3 multiple domains 2 (Sh3md2), transcript variant 2, mRNA.       |
| Serf1         | 20365  | -0.68 | 3.63  | small EDRK-rich factor 1                                                        |
| Mbnl3         | 171170 | -0.68 | 1.43  | muscleblind-like 3 (Drosophila)                                                 |
| Hells         | 15201  | -0.68 | -1.23 | helicase, lymphoid specific                                                     |
| Farp1         | 223254 | -0.68 | 5.53  | FERM, RhoGEF (Arhgef) and pleckstrin domain protein 1 (chondrocyte-derived)     |
| Bcat1         | 12035  | -0.68 | 6.66  | branched chain aminotransferase 1, cytosolic                                    |
| 4931413107Rik | 113875 | -0.68 | -3.93 | RIKEN cDNA 4931413107 gene                                                      |
| Zfp52         | 22710  | -0.67 | 14.36 | zinc finger protein 52                                                          |
| Hist1h2ao     | 319171 | -0.67 | 2.08  | histone 1, H2ao                                                                 |
| Hist1h2ag     | 319167 | -0.67 | 0.93  | histone 1, H2ag                                                                 |
| Gpr56         | 14766  | -0.67 | 5.6   | G protein-coupled receptor 56                                                   |
| Gpm6a         | 234267 | -0.67 | -4.64 | glycoprotein m6a                                                                |
| A330015K06Rik | 320190 | -0.67 | -2.34 | RIKEN cDNA A330015K06 gene                                                      |

Table S1A

|               |        |       |       |                                                                                                            |
|---------------|--------|-------|-------|------------------------------------------------------------------------------------------------------------|
| 9930021J17Rik | 229488 | -0.67 | 5.96  | RIKEN cDNA 9930021J17 gene                                                                                 |
| 1110051B16Rik | 278672 | -0.67 | -1.16 | RIKEN cDNA 1110051B16 gene                                                                                 |
| Tnfrsf1b      | 21938  | -0.66 | 8.81  | tumor necrosis factor receptor superfamily, member 1b                                                      |
| Tbc1d4        | 210789 | -0.66 | 2.32  | TBC1 domain family, member 4                                                                               |
| Plk3          | 12795  | -0.66 | 0.88  | polo-like kinase 3 (Drosophila)                                                                            |
| Osbpl3        | 71720  | -0.66 | 5.14  | oxysterol binding protein-like 3                                                                           |
| Mgmt          | 17314  | -0.66 | 1.72  | O-6-methylguanine-DNA methyltransferase                                                                    |
| IGLC3         | NA     | -0.66 | 15.82 | Mus musculus domesticus immunoglobulin lambda J3-C3-J1-C1 cluster, 3' flanking sequence.                   |
| IGKC          | NA     | -0.66 | -3.11 | Part of the germ line murine gene for kappa-immunoglobulin (last exon).                                    |
| Bcl11a        | NA     | -0.66 | 9.7   | Mus musculus B-cell CLL/lymphoma 11A (zinc finger protein), mRNA (cDNA clone IMAGE:2655319), complete cds. |
| Arhgap18      | 73910  | -0.66 | 5.82  | Rho GTPase activating protein 18                                                                           |
| Rasgef1b      | 320292 | -0.65 | 9.38  | RasGEF domain family, member 1B                                                                            |
| Ptpn5         | 19259  | -0.65 | 8.13  | protein tyrosine phosphatase, non-receptor type 5                                                          |
| Ppap2a        | 19012  | -0.65 | 8.17  | phosphatidic acid phosphatase 2a                                                                           |
| Nelf          | 56876  | -0.65 | 6.89  | nasal embryonic LHRH factor                                                                                |
| Mki67         | 17345  | -0.65 | 0.68  | antigen identified by monoclonal antibody Ki 67                                                            |
| Mastl         | 67121  | -0.65 | -4.25 | microtubule associated serine/threonine kinase-like                                                        |
| LOC382646     | NA     | -0.65 | 3.8   | Mus musculus similar to Ig delta chain C region, membrane-bound form - mouse (LOC382646), mRNA.            |
| Gla           | 11605  | -0.65 | -2.9  | galactosidase, alpha                                                                                       |
| Ear1          | 13586  | -0.65 | -2.37 | eosinophil-associated, ribonuclease A family, member 1                                                     |
| C330008K14Rik | 77619  | -0.65 | 6.23  | RIKEN cDNA C330008K14 gene                                                                                 |
| 2410003J06Rik | 71967  | -0.65 | 19.14 | RIKEN cDNA 2410003J06 gene                                                                                 |
| Tnfrsf13c     | 72049  | -0.64 | 5.71  | tumor necrosis factor receptor superfamily, member 13c                                                     |
| Rasgef1a      | 70727  | -0.64 | -1.63 | RasGEF domain family, member 1A                                                                            |
| Marvel2       | 218518 | -0.64 | 3.67  | MARVEL (membrane-associating) domain containing 2                                                          |
| Il1r2         | 16178  | -0.64 | 2.61  | interleukin 1 receptor, type II                                                                            |
| Igk-V28       | 16114  | -0.64 | -4.07 | immunoglobulin kappa chain variable 28 (V28)                                                               |
| Hist1h2ak     | 319169 | -0.64 | 0     | histone 1, H2ak                                                                                            |
| H2-Eb1        | 14969  | -0.64 | -0.35 | histocompatibility 2, class II antigen E beta                                                              |
| Ear1          | 13586  | -0.64 | -2.25 | eosinophil-associated, ribonuclease A family, member 1                                                     |
| A530030E21Rik | 320731 | -0.64 | 5.55  | RIKEN cDNA A530030E21 gene                                                                                 |
| A230020G22Rik | 229499 | -0.64 | 11.57 | RIKEN cDNA A230020G22 gene                                                                                 |
| Zdhhc2        | 70546  | -0.63 | 0.24  | zinc finger, DHHC domain containing 2                                                                      |
| Tank          | 21353  | -0.63 | 10.77 | TRAF family member-associated Nf-kappa B activator                                                         |
| Syt12         | 83671  | -0.63 | 2     | synaptotagmin-like 2                                                                                       |
| Sh3bgr1       | 56726  | -0.63 | 8.15  | SH3-binding domain glutamic acid-rich protein like                                                         |
| Sf3b1         | 81898  | -0.63 | -3.92 | splicing factor 3b, subunit 1                                                                              |
| Nkg7          | 72310  | -0.63 | -0.5  | natural killer cell group 7 sequence                                                                       |
| Ncf2          | 17970  | -0.63 | 3.6   | neutrophil cytosolic factor 2                                                                              |
| Map17         | 67182  | -0.63 | 14.71 | membrane-associated protein 17                                                                             |
| Kdt1          | 16543  | -0.63 | 7.51  | kidney cell line derived transcript 1                                                                      |
| Igfbp7        | 29817  | -0.63 | 2.63  | insulin-like growth factor binding protein 7                                                               |
| Hist1h2ai     | 319191 | -0.63 | 0.83  | histone 1, H2ai                                                                                            |
| Hap1          | 15114  | -0.63 | 5.52  | huntingtin-associated protein 1                                                                            |
| 9030411K21Rik | 71557  | -0.63 | -4.18 | RIKEN cDNA 9030411K21 gene                                                                                 |
| 5730453H04Rik | 105072 | -0.63 | -2.89 | RIKEN cDNA 5730453H04 gene                                                                                 |
| 4932412D23Rik | 75722  | -0.63 | -3.87 | RIKEN cDNA 4932412D23 gene                                                                                 |
| Tns           | 21961  | -0.62 | 0.48  | tensin                                                                                                     |
| Scrg3         | 20286  | -0.62 | 2.03  | scrapie responsive gene 3                                                                                  |
| Sat1          | 20229  | -0.62 | 3.13  | spermidine/spermine N1-acetyl transferase 1                                                                |
| Pon3          | 269823 | -0.62 | 4.21  | paraoxonase 3                                                                                              |
| IGKV6-c       | NA     | -0.62 | -3.06 | Mus musculus (SK/CamRK) germline IgK gene, V-region.                                                       |
| Gch1          | 14528  | -0.62 | -1.52 | GTP cyclohydrolase 1                                                                                       |
| Eomes         | 13813  | -0.62 | 8.77  | eomesodermin homolog (Xenopus laevis)                                                                      |
| E030024M05Rik | 217430 | -0.62 | 7.06  | RIKEN cDNA E030024M05 gene                                                                                 |
| Ctla4         | 12477  | -0.62 | 1.29  | cytotoxic T-lymphocyte-associated protein 4                                                                |
| Alcam         | 11658  | -0.62 | 10.27 | activated leukocyte cell adhesion molecule                                                                 |
| A530052I06Rik | 99953  | -0.62 | 4.29  | RIKEN cDNA A530052I06 gene                                                                                 |
| 6530404N21Rik | 67795  | -0.62 | -0.41 | RIKEN cDNA 6530404N21 gene                                                                                 |
| Rnase6        | 78416  | -0.61 | 5.14  | ribonuclease A family, member 6                                                                            |
| Ndrp1         | 17988  | -0.61 | 3.88  | N-myc downstream regulated gene 1                                                                          |
| IGKV6-32      | NA     | -0.61 | -3.3  | Mus musculus IgVk 19-32 gene.                                                                              |
| Igk-V1        | 16081  | -0.61 | -1.7  | immunoglobulin kappa chain variable 1 (V1)                                                                 |
| Hist1h2ad     | 319165 | -0.61 | 0.01  | histone 1, H2ad                                                                                            |
| D730019B10Rik | 237256 | -0.61 | 2.71  | RIKEN cDNA D730019B10 gene                                                                                 |
| Cd200r1       | 57781  | -0.61 | 3.53  | CD200 receptor 1                                                                                           |
| Cd19          | 12478  | -0.61 | 5.78  | CD19 antigen                                                                                               |
| C330023F11Rik | 109232 | -0.61 | 5.02  | RIKEN cDNA C330023F11 gene                                                                                 |
| C2ta          | 12265  | -0.61 | -1.09 | class II transactivator                                                                                    |
| Bcl6          | 12053  | -0.61 | 14.74 | B-cell leukemia/lymphoma 6                                                                                 |
| 9630014C11Rik | 78570  | -0.61 | 0.88  | RIKEN cDNA 9630014C11 gene                                                                                 |
| Samsn1        | 67742  | -0.6  | 8.05  | SAM domain, SH3 domain and nuclear localisation signals, 1                                                 |
| Reps1         | 19707  | -0.6  | 7.02  | RalBP1 associated Eps domain containing protein                                                            |
| Ly86          | 17084  | -0.6  | 1.23  | lymphocyte antigen 86                                                                                      |
| LOC382646     | NA     | -0.6  | 2.78  | Mus musculus similar to Ig delta chain C region, membrane-bound form - mouse (LOC382646), mRNA.            |
| li            | 16149  | -0.6  | -0.91 | Ia-associated invariant chain                                                                              |
| Icsbp1        | 15900  | -0.6  | 1.79  | interferon consensus sequence binding protein 1                                                            |
| Gstt3         | 103140 | -0.6  | 7     | glutathione S-transferase, theta 3                                                                         |
| Gphn          | 268566 | -0.6  | 4.89  | gephyrin                                                                                                   |
| Ddit4         | 74747  | -0.6  | 3.52  | DNA-damage-inducible transcript 4                                                                          |
| Casp3         | 12367  | -0.6  | 7.72  | caspase 3, apoptosis related cysteine protease                                                             |
| A930031D07Rik | 213006 | -0.6  | 6.68  | RIKEN cDNA A930031D07 gene                                                                                 |
| 2310026E23Rik | 67621  | -0.6  | 4.24  | RIKEN cDNA 2310026E23 gene                                                                                 |
| 1200008O12Rik | 74107  | -0.6  | -0.91 | RIKEN cDNA 1200008O12 gene                                                                                 |
| Spry1         | 24063  | -0.59 | 3.07  | sprouty homolog 1 (Drosophila)                                                                             |
| Spag5         | 54141  | -0.59 | -0.78 | sperm associated antigen 5                                                                                 |
| Siat8d        | 20452  | -0.59 | 9.2   | sialyltransferase 8 (alpha-2, 8-sialyltransferase) D                                                       |
| Rmcs1         | 114887 | -0.59 | -0.94 | response to metastatic cancers 1                                                                           |
| Rln3          | 212108 | -0.59 | 13.37 | relaxin 3                                                                                                  |
| Phtf2         | 68770  | -0.59 | 6.5   | putative homeodomain transcription factor 2                                                                |
| Olfir134      | 258829 | -0.59 | -4.19 | olfactory receptor 134                                                                                     |
| Ear3          | 53876  | -0.59 | -1.03 | eosinophil-associated, ribonuclease A family, member 3                                                     |

Table S1A

|               |        |       |       |                                                                                                     |
|---------------|--------|-------|-------|-----------------------------------------------------------------------------------------------------|
| Chi3l3        | 12655  | -0.59 | 3.97  | chitinase 3-like 3                                                                                  |
| Cd24a         | 12484  | -0.59 | -0.05 | CD24a antigen                                                                                       |
| Capn3         | 12335  | -0.59 | 5.72  | calpain 3                                                                                           |
| Bcar3         | 29815  | -0.59 | 4.35  | breast cancer anti-estrogen resistance 3                                                            |
| 5830456J23Rik | 76105  | -0.59 | 2.17  | RIKEN cDNA 5830456J23 gene                                                                          |
| 2900026A02Rik | 243219 | -0.59 | 8.78  | RIKEN cDNA 2900026A02 gene                                                                          |
| Tgtp          | 21822  | 0.59  | 7.91  | T-cell specific GTPase                                                                              |
| Sgk3          | NA     | 0.59  | 8     | Mus musculus serum/glucocorticoid regulated kinase 3 (Sgk3), mRNA.                                  |
| Satb1         | 20230  | 0.59  | 4.28  | special AT-rich sequence binding protein 1                                                          |
| 4930485D02Rik | 75812  | 0.59  | 9.47  | RIKEN cDNA 4930485D02 gene                                                                          |
| 1500004A08Rik | 216505 | 0.59  | 7.54  | RIKEN cDNA 1500004A08 gene                                                                          |
| V2r1b         | 56552  | 0.6   | -5.71 | vomerolnasal 2, receptor, 1b                                                                        |
| D11ErtD759e   | 268513 | 0.61  | 6.57  | DNA segment, Chr 11, ERATO Doi 759, expressed                                                       |
| C030002B11Rik | 78540  | 0.61  | 4.94  | RIKEN cDNA C030002B11 gene                                                                          |
| 9130427A09Rik | 107022 | 0.61  | 5.02  | RIKEN cDNA 9130427A09 gene                                                                          |
| 4632430A05Rik | 77587  | 0.61  | -2.81 | RIKEN cDNA 4632430A05 gene                                                                          |
| Oasl2         | 23962  | 0.62  | 6.37  | 2'-5' oligoadenylate synthetase-like 2                                                              |
| Lef1          | 16842  | 0.62  | 2.25  | lymphoid enhancer binding factor 1                                                                  |
| Grap2         | 17444  | 0.62  | 7.76  | GRB2-related adaptor protein 2                                                                      |
| Eraf          | 170812 | 0.62  | 0.03  | erythroid associated factor                                                                         |
| Art4          | 109978 | 0.62  | 9.84  | ADP-ribosyltransferase 4                                                                            |
| Lip1          | 16889  | 0.63  | 9.89  | lysosomal acid lipase 1                                                                             |
| 1110007C02Rik | 71784  | 0.63  | 3.79  | RIKEN cDNA 1110007C02 gene                                                                          |
| Daf1          | 13136  | 0.64  | 4.79  | decay accelerating factor 1                                                                         |
| 1810045K07Rik | 67887  | 0.64  | 10.33 | RIKEN cDNA 1810045K07 gene                                                                          |
| Slc28a2       | 269346 | 0.65  | 0.83  | solute carrier family 28 (sodium-coupled nucleoside transporter), member 2                          |
| Igtp          | 16145  | 0.65  | 7.89  | interferon gamma induced GTPase                                                                     |
| E430024C06Rik | 319443 | 0.65  | -2.43 | RIKEN cDNA E430024C06 gene                                                                          |
| AW536289      | 104645 | 0.65  | 4.86  | expressed sequence AW536289                                                                         |
| Pdlim1        | 54132  | 0.66  | 3.95  | PDZ and LIM domain 1 (elfin)                                                                        |
| Crif3         | 54394  | 0.66  | 4.35  | cytokine receptor-like factor 3                                                                     |
| Rcn1          | 19672  | 0.67  | 5.93  | reticulocalbin 1                                                                                    |
| Pdk1          | 228026 | 0.67  | 15.3  | pyruvate dehydrogenase kinase, isoenzyme 1                                                          |
| Ifi44         | 99899  | 0.67  | -4.98 | interferon-induced protein 44                                                                       |
| Bclp2         | 229687 | 0.67  | 4.48  | chitinase like protein 2                                                                            |
| Actn2         | 11472  | 0.67  | 9.35  | actinin alpha 2                                                                                     |
| Abca3         | 27410  | 0.67  | -5.16 | ATP-binding cassette, sub-family A (ABC1), member 3                                                 |
| 2610019F03Rik | 72148  | 0.67  | 12.6  | RIKEN cDNA 2610019F03 gene                                                                          |
| 1810045K07Rik | NA     | 0.67  | 5.67  | Mus musculus RIKEN cDNA 1810045K07 gene (1810045K07Rik), mRNA.                                      |
| Zbp1          | 58203  | 0.68  | 0.45  | Z-DNA binding protein 1                                                                             |
| Igfbp4        | 16010  | 0.68  | 2.43  | insulin-like growth factor binding protein 4                                                        |
| Adamts7       | 108153 | 0.68  | -5.71 | a disintegrin-like and metalloprotease (reprolysin type) with thrombospondin type 1 motif, 7        |
| Herc1         | 235439 | 0.69  | -5.77 | hect (homologous to the E6-AP (UBE3A) carboxyl terminus) domain and RCC1 (CHC1)-like domain (RLD) 1 |
| Sifn5         | 327978 | 0.71  | 2.21  | schlafen 5                                                                                          |
| Gbp2          | 14469  | 0.71  | 5.44  | guanylate nucleotide binding protein 2                                                              |
| A1661017      | 213068 | 0.71  | 9.05  | expressed sequence A1661017                                                                         |
| E430004N04Rik | 210757 | 0.72  | 7.17  | RIKEN cDNA E430004N04 gene                                                                          |
| BC022645      | 235633 | 0.73  | 2.2   | cDNA sequence BC022645                                                                              |
| 2610204G22Rik | 70448  | 0.73  | 6.8   | RIKEN cDNA 2610204G22 gene                                                                          |
| 1700012B18Rik | 71839  | 0.73  | 8.81  | RIKEN cDNA 1700012B18 gene                                                                          |
| Trib3         | 228775 | 0.74  | 9.2   | tribbles homolog 3 (Drosophila)                                                                     |
| Ifit3         | 15959  | 0.76  | 0.88  | interferon-induced protein with tetratricopeptide repeats 3                                         |
| 2010002M12Rik | 112419 | 0.76  | 4.77  | RIKEN cDNA 2010002M12 gene                                                                          |
| Nme7          | NA     | 0.77  | 12.49 | Mus musculus non-metastatic cells 7, protein expressed in (Nme7), mRNA.                             |
| Terg-V4       | 21638  | 0.78  | 3.67  | T-cell receptor gamma, variable 4                                                                   |
| Pdlim4        | 30794  | 0.81  | 6.82  | PDZ and LIM domain 4                                                                                |
| Socs3         | 12702  | 0.82  | 3.59  | suppressor of cytokine signaling 3                                                                  |
| 2310046K10Rik | NA     | 0.82  | 8.57  | Mus musculus RIKEN cDNA 2310046K10 gene (2310046K10Rik), transcript variant a, mRNA.                |
| Ifit3         | 15959  | 0.83  | 1.78  | interferon-induced protein with tetratricopeptide repeats 3                                         |
| Dntt          | 21673  | 0.83  | 10.52 | deoxynucleotidyltransferase, terminal                                                               |
| A130092J06Rik | 241303 | 0.83  | 5.48  | RIKEN cDNA A130092J06 gene                                                                          |
| Tyki          | 22169  | 0.87  | 1.31  | thymidylate kinase family LPS-inducible member                                                      |
| Ifit3         | 15959  | 0.87  | 1.68  | interferon-induced protein with tetratricopeptide repeats 3                                         |
| 5830431A10Rik | 76024  | 0.88  | 5.47  | RIKEN cDNA 5830431A10 gene                                                                          |
| Igfbp4        | 16010  | 0.93  | 12.88 | insulin-like growth factor binding protein 4                                                        |
| Ly6f          | 17071  | 0.94  | 19.96 | lymphocyte antigen 6 complex, locus F                                                               |
| Tubb2         | 22151  | 0.95  | 17.1  | tubulin, beta 2                                                                                     |
| Slc16a5       | 217316 | 0.95  | 10.83 | solute carrier family 16 (monocarboxylic acid transporters), member 5                               |
| 2310032F03Rik | 76747  | 0.96  | 2.42  | RIKEN cDNA 2310032F03 gene                                                                          |
| Atp1b1        | 11931  | 0.98  | 11.38 | ATPase, Na <sup>+</sup> /K <sup>+</sup> transporting, beta 1 polypeptide                            |
| Sh3bgrl2      | 212531 | 0.99  | 14.56 | SH3 domain binding glutamic acid-rich protein like 2                                                |
| Nme7          | NA     | 0.99  | 12.35 | Mus musculus non-metastatic cells 7, protein expressed in (Nme7), mRNA.                             |
| Txk           | 22165  | 1     | 15.13 | TXK tyrosine kinase                                                                                 |
| Ly6a          | 110454 | 1.01  | 7.31  | lymphocyte antigen 6 complex, locus A                                                               |
| Dnajd1        | 66148  | 1.01  | 6.03  | DnaJ (Hsp40) homolog, subfamily D, member 1                                                         |
| Epsti1        | 108670 | 1.02  | 10.66 | epithelial stromal interaction 1 (breast)                                                           |
| Prf1          | 18646  | 1.03  | 13.95 | perforin 1 (pore forming protein)                                                                   |
| Ifit1         | 15957  | 1.06  | -0.26 | interferon-induced protein with tetratricopeptide repeats 1                                         |
| 1500005K14Rik | 76566  | 1.14  | 10.75 | RIKEN cDNA 1500005K14 gene                                                                          |
| Tec           | 21682  | 1.17  | 12.8  | cytoplasmic tyrosine kinase, Dscr28C related (Drosophila)                                           |
| Oas2          | 246728 | 1.21  | 7.49  | 2'-5' oligoadenylate synthetase 2                                                                   |
| Gzma          | 14938  | 1.28  | -1.73 | granzyme A                                                                                          |
| Ly6c          | 17067  | 1.34  | 11.85 | lymphocyte antigen 6 complex, locus C                                                               |
| BC029719      | 270179 | 1.48  | 11.6  | cDNA sequence BC029719                                                                              |
| Bclp2         | 229687 | 1.56  | 19.52 | chitinase like protein 2                                                                            |
| Myo6          | 17920  | 2.89  | 19.95 | myosin VI                                                                                           |

Table S1B

| Symbol        | GeneID | Tmem fold change (log <sub>2</sub> ) | B statistic | Description                                                                                                |
|---------------|--------|--------------------------------------|-------------|------------------------------------------------------------------------------------------------------------|
| Gpm6b         | 14758  | -2.01                                | 12.58       | glycoprotein m6b                                                                                           |
| Tbc1d8        | 54610  | -1.57                                | 13.69       | TBC1 domain family, member 8                                                                               |
| Lmo2          | 16909  | -1.46                                | 16.11       | LIM domain only 2                                                                                          |
| AW046396      | 329173 | -1.45                                | 16.89       | expressed sequence AW046396                                                                                |
| 2610012C04Rik | 70299  | -1.44                                | 12.46       | RIKEN cDNA 2610012C04 gene                                                                                 |
| Egr1          | 13653  | -1.38                                | 10.17       | early growth response 1                                                                                    |
| Il4i1         | 14204  | -1.35                                | 6.96        | interleukin 4 induced 1                                                                                    |
| 2210421G13Rik | 108956 | -1.35                                | 7.66        | RIKEN cDNA 2210421G13 gene                                                                                 |
| Serpnb10      | 241197 | -1.34                                | 5.01        | serine (or cysteine) proteinase inhibitor, clade B (ovalbumin), member 10                                  |
| Rtn1          | 104001 | -1.34                                | 11.93       | reticulon 1                                                                                                |
| Mmp12         | 17381  | -1.33                                | 11.16       | matrix metalloproteinase 12                                                                                |
| C230002E15Rik | 319708 | -1.33                                | 10.72       | RIKEN cDNA C230002E15 gene                                                                                 |
| Flt3          | 14255  | -1.29                                | 16.81       | FMS-like tyrosine kinase 3                                                                                 |
| 2210409B22Rik | 70174  | -1.29                                | 12.82       | RIKEN cDNA 2210409B22 gene                                                                                 |
| Rnase6        | 78416  | -1.28                                | 15.38       | ribonuclease A family, member 6                                                                            |
| Dusp1         | 19252  | -1.28                                | 17.4        | dual specificity phosphatase 1                                                                             |
| Kmo           | 98256  | -1.26                                | 19.48       | kynurenine 3-monooxygenase (kynurenine 3-hydroxylase)                                                      |
| Emr1          | 13733  | -1.26                                | 14.55       | EGF-like module containing, mucin-like, hormone receptor-like sequence 1                                   |
| Hap1          | 15114  | -1.24                                | 14.98       | huntingtin-associated protein 1                                                                            |
| 2900022I03Rik | 72849  | -1.24                                | 13.68       | RIKEN cDNA 2900022I03 gene                                                                                 |
| Adam11        | 11488  | -1.23                                | 2.86        | a disintegrin and metalloprotease domain 11                                                                |
| Igfb6         | 80719  | -1.22                                | 14.03       | immunoglobulin superfamily, member 6                                                                       |
| Ccnd1         | 12443  | -1.22                                | 10.25       | cyclin D1                                                                                                  |
| Basp1         | 70350  | -1.22                                | 13.39       | brain abundant, membrane attached signal protein 1                                                         |
| Fos           | 14281  | -1.21                                | 3.11        | FBJ osteosarcoma oncogene                                                                                  |
| Kynu          | 70789  | -1.2                                 | 11.6        | kynureninase (L-kynurenine hydrolase)                                                                      |
| Klrb1c        | 17059  | -1.2                                 | 7.78        | killer cell lectin-like receptor subfamily B member 1C                                                     |
| Gpr124        | NA     | -1.2                                 | 5.53        | Mus musculus G protein-coupled receptor 124 (Gpr124), mRNA.                                                |
| Ube2e2        | 218793 | -1.19                                | 9.39        | ubiquitin-conjugating enzyme E2E 2 (UBC4/5 homolog, yeast)                                                 |
| Scap2         | 54353  | -1.19                                | 12.05       | src family associated phosphoprotein 2                                                                     |
| Ear1          | 13586  | -1.19                                | 3.58        | eosinophil-associated, ribonuclease A family, member 1                                                     |
| Dscam         | 13508  | -1.19                                | 10.76       | Down syndrome cell adhesion molecule                                                                       |
| 2900052N01Rik | 73040  | -1.19                                | 17.07       | RIKEN cDNA 2900052N01 gene                                                                                 |
| Klf4          | 16600  | -1.18                                | 16.23       | Kruppel-like factor 4 (gut)                                                                                |
| A130001G05Rik | 320704 | -1.18                                | 10.86       | RIKEN cDNA A130001G05 gene                                                                                 |
| 4921513O20Rik | 66725  | -1.18                                | 14.03       | RIKEN cDNA 4921513O20 gene                                                                                 |
| 2010002N04Rik | 106878 | -1.18                                | 9.3         | RIKEN cDNA 2010002N04 gene                                                                                 |
| Rp2h          | 19889  | -1.17                                | 10.39       | retinitis pigmentosa 2 homolog (human)                                                                     |
| Ogfrl1        | 70155  | -1.17                                | 10.67       | opioid growth factor receptor-like 1                                                                       |
| Hmgn3         | 94353  | -1.17                                | 5.89        | high mobility group nucleosomal binding domain 3                                                           |
| 0610012D17Rik | 66061  | -1.17                                | 13.18       | RIKEN cDNA 0610012D17 gene                                                                                 |
| Spint1        | 20732  | -1.16                                | 15.86       | serine protease inhibitor, Kunitz type 1                                                                   |
| BC035044      | 232406 | -1.16                                | 8.07        | cDNA sequence BC035044                                                                                     |
| Sash1         | 70097  | -1.15                                | 14.96       | SAM and SH3 domain containing 1                                                                            |
| Igfb7         | 140497 | -1.15                                | 16.72       | immunoglobulin superfamily, member 7                                                                       |
| 5031439G07Rik | 223739 | -1.15                                | 12.8        | RIKEN cDNA 5031439G07 gene                                                                                 |
| Hspa1b        | 15511  | -1.14                                | -5.21       | heat shock protein 1B                                                                                      |
| Ear1          | 13586  | -1.14                                | 2.82        | eosinophil-associated, ribonuclease A family, member 1                                                     |
| D930021L15Rik | 319420 | -1.14                                | 5.82        | RIKEN cDNA D930021L15 gene                                                                                 |
| BC035044      | 232406 | -1.14                                | 9.04        | cDNA sequence BC035044                                                                                     |
| Asb2          | 65256  | -1.14                                | 11.16       | ankyrin repeat and SOCS box-containing protein 2                                                           |
| Cd83          | 12522  | -1.13                                | 5.4         | CD83 antigen                                                                                               |
| BC022623      | 224093 | -1.13                                | 6.21        | cDNA sequence BC022623                                                                                     |
| Adam23        | 23792  | -1.13                                | 8.48        | a disintegrin and metalloprotease domain 23                                                                |
| Dnase1l3      | 13421  | -1.12                                | 11.26       | deoxyribonuclease 1-like 3                                                                                 |
| Sort1         | 20661  | -1.11                                | 7.35        | sortilin 1                                                                                                 |
| Sort1         | 20661  | -1.11                                | 5.97        | sortilin 1                                                                                                 |
| Ryr3          | 20192  | -1.11                                | 17.97       | ryanodine receptor 3                                                                                       |
| Rp2h          | 19889  | -1.11                                | 13.32       | retinitis pigmentosa 2 homolog (human)                                                                     |
| Ptger3        | 19218  | -1.11                                | 8.38        | prostaglandin E receptor 3 (subtype EP3)                                                                   |
| Hck           | 15162  | -1.11                                | 17.02       | hemopoietic cell kinase                                                                                    |
| Sirpb         | 320832 | -1.1                                 | 8.74        | signal-regulatory protein beta                                                                             |
| E130112L23Rik | 268739 | -1.1                                 | 9.96        | RIKEN cDNA E130112L23 gene                                                                                 |
| 1100001H23Rik | 66857  | -1.1                                 | 6.94        | RIKEN cDNA 1100001H23 gene                                                                                 |
| Tnfrsf4       | 22163  | -1.09                                | 6.22        | tumor necrosis factor receptor superfamily, member 4                                                       |
| Marcks        | 17118  | -1.09                                | 14.91       | myristoylated alanine rich protein kinase C substrate                                                      |
| Fgr           | 14191  | -1.08                                | 10.43       | Gardner-Rasheed feline sarcoma viral (Fgr) oncogene homolog                                                |
| Anxa3         | 11745  | -1.08                                | 7.73        | annexin A3                                                                                                 |
| 1300007C21Rik | 67527  | -1.08                                | -3.1        | RIKEN cDNA 1300007C21 gene                                                                                 |
| Ncf2          | 17970  | -1.07                                | 10.56       | neutrophil cytosolic factor 2                                                                              |
| Fcgr1g        | 14127  | -1.07                                | 12.93       | Fc receptor, IgE, high affinity I, gamma polypeptide                                                       |
| 9930027N05Rik | NA     | -1.07                                | 12.64       | Mus musculus RIKEN cDNA 9930027N05 gene (9930027N05Rik), transcript variant 2, mRNA.                       |
| Rgs18         | 64214  | -1.06                                | 8.07        | regulator of G-protein signaling 18                                                                        |
| Ptxnc1        | 54712  | -1.06                                | 12.04       | plexin C1                                                                                                  |
| Nr4a1         | 15370  | -1.06                                | 5.9         | nuclear receptor subfamily 4, group A, member 1                                                            |
| Cybb          | 13058  | -1.06                                | 11.45       | cytochrome b-245, beta polypeptide                                                                         |
| Bcl11a        | NA     | -1.06                                | 16.59       | Mus musculus B-cell CLL/lymphoma 11A (zinc finger protein), mRNA (cDNA clone IMAGE:2655319), complete cds. |
| Slamf8        | 74748  | -1.05                                | 10.94       | SLAM family member 8                                                                                       |
| Mpeg1         | 17476  | -1.05                                | 5.77        | macrophage expressed gene 1                                                                                |
| Ifitm6        | 213002 | -1.05                                | 5.49        | interferon induced transmembrane protein 6                                                                 |
| Gsn           | NA     | -1.05                                | 10.77       | Mus musculus gelsolin (Gsn), mRNA.                                                                         |
| Gpr124        | 78560  | -1.05                                | 15.99       | G protein-coupled receptor 124                                                                             |
| C030046G05    | 327885 | -1.05                                | 10.14       | hypothetical protein C030046G05                                                                            |
| Arhgap6       | 11856  | -1.05                                | 4.8         | Rho GTPase activating protein 6                                                                            |
| 6430529G09Rik | 233274 | -1.05                                | 3.89        | RIKEN cDNA 6430529G09 gene                                                                                 |
| Sulf2         | 72043  | -1.04                                | 16.24       | sulfatase 2                                                                                                |
| BC023928      | 268377 | -1.04                                | 9.88        | cDNA sequence BC023928                                                                                     |
| App           | 11820  | -1.04                                | 7.8         | amyloid beta (A4) precursor protein                                                                        |
| Npl           | 74091  | -1.03                                | 13.85       | N-acetylneuraminidase                                                                                      |
| Gpr43         | 233079 | -1.03                                | 9.92        | G protein-coupled receptor 43                                                                              |

Table S1B

|               |        |       |       |                                                                                           |
|---------------|--------|-------|-------|-------------------------------------------------------------------------------------------|
| Plek          | 56193  | -1.02 | 12.23 | pleckstrin                                                                                |
| 9630014C11Rik | 78570  | -1.02 | 6.92  | RIKEN cDNA 9630014C11 gene                                                                |
| Tm6sf1        | 107769 | -1.01 | 14.37 | transmembrane 6 superfamily member 1                                                      |
| Kctd12        | 239217 | -1.01 | 9.69  | potassium channel tetramerisation domain containing 12                                    |
| Cybb          | 13058  | -1.01 | 12.46 | cytochrome b-245, beta polypeptide                                                        |
| Clecsf12      | 56644  | -1.01 | 7.38  | C-type (calcium dependent, carbohydrate recognition domain) lectin, superfamily member 12 |
| 9830002117Rik | 77577  | -1.01 | 10.48 | RIKEN cDNA 9830002117 gene                                                                |
| 2510048K03Rik | 72461  | -1.01 | 14.82 | RIKEN cDNA 2510048K03 gene                                                                |
| 2210020M01Rik | 66528  | -1.01 | 3.79  | RIKEN cDNA 2210020M01 gene                                                                |
| Rhoq          | 104215 | -1    | 8.01  | ras homolog gene family, member Q                                                         |
| Arhgap22      | 239027 | -1    | 10.21 | Rho GTPase activating protein 22                                                          |
| TRGC4         | NA     | -0.99 | 0.51  | Mus musculus T cell receptor gamma locus, TCR gamma 2 and gamma 4 gene clusters.          |
| Sat1          | 20229  | -0.99 | 9.16  | spermidine/spermine N1-acetyl transferase 1                                               |
| BC003277      | 214359 | -0.99 | 8.03  | cDNA sequence BC003277                                                                    |
| A530045L16Rik | 319528 | -0.99 | 0.26  | RIKEN cDNA A530045L16 gene                                                                |
| A330066M24Rik | 320357 | -0.99 | 9.31  | RIKEN cDNA A330066M24 gene                                                                |
| Pmaip1        | 58801  | -0.98 | 10.88 | phorbol-12-myristate-13-acetate-induced protein 1                                         |
| Irf5          | 27056  | -0.98 | 10.45 | interferon regulatory factor 5                                                            |
| Dna2l         | 327762 | -0.98 | 5.92  | DNA2 DNA replication helicase 2-like (yeast)                                              |
| Csf2ra        | 12982  | -0.98 | 13.24 | colony stimulating factor 2 receptor, alpha, low-affinity (granulocyte-macrophage)        |
| 2410025L10Rik | 381668 | -0.98 | 1.95  | RIKEN cDNA 2410025L10 gene                                                                |
| Kcnk6         | 52150  | -0.97 | 7.67  | potassium inwardly-rectifying channel, subfamily K, member 6                              |
| Dkk2          | 56811  | -0.97 | 5.16  | dickkopf homolog 2 (Xenopus laevis)                                                       |
| Ctsh          | 13036  | -0.97 | 5.13  | cathepsin H                                                                               |
| Cd81          | 12520  | -0.97 | 10    | CD 81 antigen                                                                             |
| 9030208C03Rik | 320131 | -0.97 | 6.25  | RIKEN cDNA 9030208C03 gene                                                                |
| Tyrobp        | 22177  | -0.96 | 6.71  | TYRO protein tyrosine kinase binding protein                                              |
| Nrn1          | 68404  | -0.96 | 8.68  | neuritin 1                                                                                |
| Ckb           | 12709  | -0.96 | 10    | creatine kinase, brain                                                                    |
| Ces2          | 234671 | -0.96 | 5.72  | carboxylesterase 2                                                                        |
| Cd209a        | 170786 | -0.96 | 15.05 | CD209a antigen                                                                            |
| 1200006F02Rik | 71706  | -0.96 | 12.06 | RIKEN cDNA 1200006F02 gene                                                                |
| Tcf4          | 21413  | -0.95 | 6.37  | transcription factor 4                                                                    |
| Rgs2          | 19735  | -0.95 | 7.68  | regulator of G-protein signaling 2                                                        |
| Ptpns1        | 19261  | -0.95 | 7.34  | protein tyrosine phosphatase, non-receptor type substrate 1                               |
| Lrrc16        | 68732  | -0.95 | 13.8  | leucine rich repeat containing 16                                                         |
| Cd63          | 12512  | -0.95 | 5.95  | CD63 antigen                                                                              |
| 2810451E09Rik | 72821  | -0.95 | 16.14 | RIKEN cDNA 2810451E09 gene                                                                |
| 1600010M07Rik | 69781  | -0.95 | 11.09 | RIKEN cDNA 1600010M07 gene                                                                |
| Zfx1b         | 24136  | -0.94 | 8.59  | zinc finger homeobox 1b                                                                   |
| Tgfb1         | 21810  | -0.94 | 7.81  | transforming growth factor, beta induced                                                  |
| Lrp1          | NA     | -0.94 | 5.79  | Mus musculus low density lipoprotein receptor-related protein 1 (Lrp1), mRNA.             |
| Dab2ip        | 69601  | -0.94 | 12.75 | disabled homolog 2 (Drosophila) interacting protein                                       |
| C2ta          | 12265  | -0.94 | 3.29  | class II transactivator                                                                   |
| 6330407A03Rik | 70720  | -0.94 | 7.19  | RIKEN cDNA 6330407A03 gene                                                                |
| Rab32         | 67844  | -0.93 | 14.36 | RAB32, member RAS oncogene family                                                         |
| Mil14         | 17356  | -0.93 | 7.62  | myeloid/lymphoid or mixed lineage-leukemia translocation to 4 homolog (Drosophila)        |
| Hist1h1c      | 50708  | -0.93 | 18.7  | histone 1, H1c                                                                            |
| H2-DMb1       | 14999  | -0.93 | 8.62  | histocompatibility 2, class II, locus Mb1                                                 |
| E030003N15Rik | 105841 | -0.93 | 12.44 | RIKEN cDNA E030003N15 gene                                                                |
| Dock7         | 67299  | -0.93 | 3.77  | dedicator of cytokinesis 7                                                                |
| B130040O20Rik | 320962 | -0.93 | 10.2  | RIKEN cDNA B130040O20 gene                                                                |
| A1132321      | 104759 | -0.93 | 6.48  | expressed sequence A1132321                                                               |
| Rnf149        | 67702  | -0.92 | 5.94  | ring finger protein 149                                                                   |
| Gcnt2         | 14538  | -0.92 | 10.58 | glucosaminyl (N-acetyl) transferase 2, I-branching enzyme                                 |
| Egr3          | 13655  | -0.92 | 18.81 | early growth response 3                                                                   |
| BC049354      | 269799 | -0.92 | 9.49  | cDNA sequence BC049354                                                                    |
| A530088I07Rik | 212167 | -0.92 | 9.11  | RIKEN cDNA A530088I07 gene                                                                |
| Tlr13         | 279572 | -0.91 | 6.85  | toll-like receptor 13                                                                     |
| Rgs1          | 50778  | -0.91 | 2.83  | regulator of G-protein signaling 1                                                        |
| Lyzs          | 17105  | -0.91 | 0.59  | lysozyme                                                                                  |
| Igk-C         | 16071  | -0.91 | -1.79 | immunoglobulin kappa chain, constant region                                               |
| Hhex          | 15242  | -0.91 | 14.95 | hematopoietically expressed homeobox                                                      |
| D930015E06Rik | 229473 | -0.91 | 14.99 | RIKEN cDNA D930015E06 gene                                                                |
| Ccnd1         | 12443  | -0.91 | 6.65  | cyclin D1                                                                                 |
| Sic8a1        | 20541  | -0.9  | 8.46  | solute carrier family 8 (sodium/calcium exchanger), member 1                              |
| Slamf7        | 75345  | -0.9  | 15.93 | SLAM family member 7                                                                      |
| Pla2g4a       | 18783  | -0.9  | 8.8   | phospholipase A2, group IVA (cytosolic, calcium-dependent)                                |
| Phca          | 66190  | -0.9  | 10.55 | phytoceramidase, alkaline                                                                 |
| Lrrk1         | 233328 | -0.9  | 12.07 | leucine-rich repeat kinase 1                                                              |
| Itgax         | 16411  | -0.9  | 15.18 | integrin alpha X                                                                          |
| Il1b          | 16176  | -0.9  | 11.92 | interleukin 1 beta                                                                        |
| Frdm4a        | 209630 | -0.9  | 4.34  | FERM domain containing 4A                                                                 |
| Dnmt3a        | 13435  | -0.9  | 2.9   | DNA methyltransferase 3A                                                                  |
| Ccnd1         | 12443  | -0.9  | 14.6  | cyclin D1                                                                                 |
| Bcl11a        | 14025  | -0.9  | 7.21  | B-cell CLL/lymphoma 11A (zinc finger protein)                                             |
| Pira4         | 18727  | -0.89 | 8.93  | paired-Ig-like receptor A4                                                                |
| Pfc           | 18636  | -0.89 | 6.17  | properdin factor, complement                                                              |
| Gpr82         | 319200 | -0.89 | 16.43 | G protein-coupled receptor 82                                                             |
| App4c         | 242557 | -0.89 | 12.82 | APG4 (ATG4) autophagy-related homolog C (S. cerevisiae)                                   |
| Anxa4         | 11746  | -0.89 | 9.24  | annexin A4                                                                                |
| Havcr2        | 171285 | -0.88 | 8.38  | hepatitis A virus cellular receptor 2                                                     |
| Card12        | 268973 | -0.88 | 14.79 | caspase recruitment domain family, member 12                                              |
| 1810009M01Rik | 65963  | -0.88 | 6.62  | RIKEN cDNA 1810009M01 gene                                                                |
| Sucnr1        | 84112  | -0.87 | 7.03  | succinate receptor 1                                                                      |
| Spry1         | 24063  | -0.87 | 8.03  | sprouty homolog 1 (Drosophila)                                                            |
| Sirpb         | 320832 | -0.87 | 7.15  | signal-regulatory protein beta                                                            |
| Rassf4        | 213391 | -0.87 | 12.84 | Ras association (RalGDS/AF-6) domain family 4                                             |
| Qk            | 19317  | -0.87 | 10.52 | quaking                                                                                   |
| Mdh2          | 17448  | -0.87 | 5.57  | malate dehydrogenase 2, NAD (mitochondrial)                                               |
| Kdr           | 16542  | -0.87 | 5.18  | kinase insert domain protein receptor                                                     |
| Ctse          | 13034  | -0.87 | -4.55 | cathepsin E                                                                               |

Table S1B

|               |        |       |       |                                                                                                           |
|---------------|--------|-------|-------|-----------------------------------------------------------------------------------------------------------|
| A430090E18Rik | 195564 | -0.87 | 12.89 | RIKEN cDNA A430090E18 gene                                                                                |
| 2810442I21Rik | 72735  | -0.87 | 5.54  | RIKEN cDNA 2810442I21 gene                                                                                |
| TRGV1         | NA     | -0.86 | -0.91 | Mouse T-cell receptor germline gamma chain gene V-region (V108B).                                         |
| Tns           | 21961  | -0.86 | 3.97  | tensin                                                                                                    |
| IGKV8-24      | NA     | -0.86 | 0.98  | Mus musculus IgVk 8-24 gene.                                                                              |
| H2-Eb1        | 14969  | -0.86 | 2.66  | histocompatibility 2, class II antigen E beta                                                             |
| Ddhd1         | 114874 | -0.86 | 1.92  | DDHD domain containing 1                                                                                  |
| 1810033B17Rik | 69189  | -0.86 | 1.41  | RIKEN cDNA 1810033B17 gene                                                                                |
| 1110055L24Rik | 66205  | -0.86 | 5.32  | RIKEN cDNA 1110055L24 gene                                                                                |
| Swap70        | 20947  | -0.85 | 13.06 | SWAP complex protein                                                                                      |
| Rmcs1         | 114887 | -0.85 | 2.55  | response to metastatic cancers 1                                                                          |
| Ramp1         | 51801  | -0.85 | 3.66  | receptor (calcitonin) activity modifying protein 1                                                        |
| Ptprs         | 19280  | -0.85 | 5.51  | protein tyrosine phosphatase, receptor type, S                                                            |
| Plcg2         | 234779 | -0.85 | 14.35 | phospholipase C, gamma 2                                                                                  |
| Mgl1          | 17312  | -0.85 | 5.99  | macrophage galactose N-acetyl-galactosamine specific lectin 1                                             |
| Ifi30         | 65972  | -0.85 | 6.35  | interferon gamma inducible protein 30                                                                     |
| H2-Oa         | 15001  | -0.85 | 8.93  | histocompatibility 2, O region alpha locus                                                                |
| Clic4         | 29876  | -0.85 | 10.45 | chloride intracellular channel 4 (mitochondrial)                                                          |
| B630019K06Rik | 102941 | -0.85 | 5.98  | RIKEN cDNA B630019K06 gene                                                                                |
| 6230421P05Rik | 109033 | -0.85 | 5.6   | RIKEN cDNA 6230421P05 gene                                                                                |
| 2900024D24Rik | 72925  | -0.85 | 13.66 | RIKEN cDNA 2900024D24 gene                                                                                |
| Vav2          | 22325  | -0.84 | 13.33 | Vav2 oncogene                                                                                             |
| Tacstd1       | 17075  | -0.84 | 12.06 | tumor-associated calcium signal transducer 1                                                              |
| Rasgrp3       | 240168 | -0.84 | 9.93  | RAS, guanyl releasing protein 3                                                                           |
| Lzf           | 66049  | -0.84 | 14.85 | leucine zipper domain protein                                                                             |
| LOC329416     | 329416 | -0.84 | 12.57 | nitric oxide synthase trafficker                                                                          |
| Igk-V28       | 16114  | -0.84 | -2.66 | immunoglobulin kappa chain variable 28 (V28)                                                              |
| Ier5          | 15939  | -0.84 | 9.37  | immediate early response 5                                                                                |
| Gpr120        | 107221 | -0.84 | 7.98  | G protein-coupled receptor 120                                                                            |
| Ahrr          | 11624  | -0.84 | 10.37 | aryl-hydrocarbon receptor repressor                                                                       |
| Xcl1          | 16963  | -0.83 | 2.82  | chemokine (C motif) ligand 1                                                                              |
| Rem1          | 19700  | -0.83 | 9.12  | rad and gem related GTP binding protein 1                                                                 |
| Pirb          | 18733  | -0.83 | 4.34  | paired-Ig-like receptor B                                                                                 |
| Kira12        | 16630  | -0.83 | -1.14 | killer cell lectin-like receptor subfamily A, member 12                                                   |
| Blink         | 17060  | -0.83 | 3.61  | B-cell linker                                                                                             |
| BC023105      | 207269 | -0.83 | 6.57  | cDNA sequence BC023105                                                                                    |
| Adam23        | NA     | -0.83 | 4.54  | Mus musculus a disintegrin and metalloprotease domain 23 (Adam23), mRNA.                                  |
| A130095M15Rik | 319928 | -0.83 | 6.02  | RIKEN cDNA A130095M15 gene                                                                                |
| 2310057H16Rik | 67951  | -0.83 | 12.76 | RIKEN cDNA 2310057H16 gene                                                                                |
| Tnfrsf5       | 21939  | -0.82 | 13.16 | tumor necrosis factor receptor superfamily, member 5                                                      |
| Pik3cb        | 74769  | -0.82 | 9.12  | phosphatidylinositol 3-kinase, catalytic, beta polypeptide                                                |
| Nucb2         | 53322  | -0.82 | 7.46  | nucleobindin 2                                                                                            |
| Kira20        | 93967  | -0.82 | -1.84 | killer cell lectin-like receptor subfamily A, member 20                                                   |
| IGHV1S56      | NA     | -0.82 | 2.59  | Mus musculus immunoglobulin heavy chain precursor (IgH J558-43Y) gene, V-region, partial cds.             |
| H2-Aa         | 14960  | -0.82 | 1.35  | histocompatibility 2, class II antigen A, alpha                                                           |
| Gsto1         | 14873  | -0.82 | 5.45  | glutathione S-transferase omega 1                                                                         |
| Ear10         | 93725  | -0.82 | 1.87  | eosinophil-associated, ribonuclease A family, member 10                                                   |
| Cyp27a1       | 104086 | -0.82 | 7.08  | cytochrome P450, family 27, subfamily a, polypeptide 1                                                    |
| Ctss          | 13040  | -0.82 | 8.34  | cathepsin S                                                                                               |
| Bcl6          | 12053  | -0.82 | 19.16 | B-cell leukemia/lymphoma 6                                                                                |
| AW490415      | 101361 | -0.82 | 10.96 | expressed sequence AW490415                                                                               |
| Zfx1b         | 24136  | -0.81 | 10.52 | zinc finger homeobox 1b                                                                                   |
| Slc6a12       | 14411  | -0.81 | 8.24  | solute carrier family 6 (neurotransmitter transporter, betaine/GABA), member 12                           |
| Nphp3         | 74025  | -0.81 | -0.08 | nephronophthisis 3 (adolescent)                                                                           |
| Ly86          | 17084  | -0.81 | 4.6   | lymphocyte antigen 86                                                                                     |
| Cd209d        | 170779 | -0.81 | 2.36  | CD209d antigen                                                                                            |
| Catnd2        | 18163  | -0.81 | 6.49  | catenin delta 2                                                                                           |
| B230311A21    | 328314 | -0.81 | 13.51 | hypothetical protein B230311A21                                                                           |
| Alcam         | 11658  | -0.81 | 10.02 | activated leukocyte cell adhesion molecule                                                                |
| A1426953      | 103207 | -0.81 | 1.62  | expressed sequence A1426953                                                                               |
| 4631426J05Rik | 77590  | -0.81 | 15.32 | RIKEN cDNA 4631426J05 gene                                                                                |
| 2810046M22Rik | 269633 | -0.81 | 8.73  | RIKEN cDNA 2810046M22 gene                                                                                |
| 1110060D06Rik | 68813  | -0.81 | 5.17  | RIKEN cDNA 1110060D06 gene                                                                                |
| Tns           | 21961  | -0.8  | 4.86  | tensin                                                                                                    |
| Siat4c        | 20443  | -0.8  | 15.61 | sialyltransferase 4C (beta-galactoside alpha-2,3-sialyltransferase)                                       |
| Rasgef1b      | 320292 | -0.8  | 12.34 | RasGEF domain family, member 1B                                                                           |
| Pip5k2a       | 18718  | -0.8  | 9.54  | phosphatidylinositol-4-phosphate 5-kinase, type II, alpha                                                 |
| Lzp-s         | 17110  | -0.8  | 0.68  | P lysozyme structural                                                                                     |
| Ifngr2        | 15980  | -0.8  | 11.84 | interferon gamma receptor 2                                                                               |
| Csf2rb2       | 12984  | -0.8  | 6.66  | colony stimulating factor 2 receptor, beta 2, low-affinity (granulocyte-macrophage)                       |
| Chka          | 12660  | -0.8  | 9.57  | choline kinase alpha                                                                                      |
| Cd80          | 12519  | -0.8  | 4.34  | CD80 antigen                                                                                              |
| 1110032F04Rik | 68725  | -0.8  | 7.24  | RIKEN cDNA 1110032F04 gene                                                                                |
| Siat8f        | 241230 | -0.79 | 3.44  | sialyltransferase 8 (alpha-2, 8-sialyltransferase) F                                                      |
| Serpina3g     | 20715  | -0.79 | 6.38  | serine (or cysteine) proteinase inhibitor, clade A, member 3G                                             |
| Ppfi4         | 68507  | -0.79 | 14.59 | protein tyrosine phosphatase, receptor type, f polypeptide (PTPRF), interacting protein (liprin), alpha 4 |
| Pira1         | 18722  | -0.79 | 9.28  | paired-Ig-like receptor A1                                                                                |
| Mef2c         | 17260  | -0.79 | 6.56  | myocyte enhancer factor 2C                                                                                |
| Lmo4          | 16911  | -0.79 | 0.47  | LIM domain only 4                                                                                         |
| IGKC          | NA     | -0.79 | -2.07 | Part of the germ line murine gene for kappa-immunoglobulin (last exon).                                   |
| Fgr           | 14191  | -0.79 | 14.61 | Gardner-Rasheed feline sarcoma viral (Fgr) oncogene homolog                                               |
| Fgd2          | 26382  | -0.79 | 6.9   | FYVE, RhoGEF and PH domain containing 2                                                                   |
| Fes           | 14159  | -0.79 | 4.91  | feline sarcoma oncogene                                                                                   |
| D630012G11Rik | 320904 | -0.79 | 5.83  | RIKEN cDNA D630012G11 gene                                                                                |
| Cerk          | 223753 | -0.79 | 9.81  | ceramide kinase                                                                                           |
| 1810018P12Rik | 74170  | -0.79 | 6.36  | RIKEN cDNA 1810018P12 gene                                                                                |
| 1810011H11Rik | 69069  | -0.79 | 3.18  | RIKEN cDNA 1810011H11 gene                                                                                |
| Ncf1          | 17969  | -0.78 | 14.83 | neutrophil cytosolic factor 1                                                                             |
| Kira16        | 27424  | -0.78 | -1.17 | killer cell lectin-like receptor, subfamily A, member 16                                                  |
| Igk-V1        | 16081  | -0.78 | 0.39  | immunoglobulin kappa chain variable 1 (V1)                                                                |
| Emr4          | 52614  | -0.78 | 5.57  | EGF-like module containing, mucin-like, hormone receptor-like sequence 4                                  |
| Cd68          | 12514  | -0.78 | 12.21 | CD68 antigen                                                                                              |

Table S1B

|               |        |       |       |                                                                                         |
|---------------|--------|-------|-------|-----------------------------------------------------------------------------------------|
| Alcam         | 11658  | -0.78 | 13.6  | activated leukocyte cell adhesion molecule                                              |
| 5730407K14Rik | 70479  | -0.78 | 11.57 | RIKEN cDNA 5730407K14 gene                                                              |
| 1300002K09Rik | 74152  | -0.78 | 13.46 | RIKEN cDNA 1300002K09 gene                                                              |
| 1110018F16Rik | 68594  | -0.78 | 5     | RIKEN cDNA 1110018F16 gene                                                              |
| Lag3          | 16768  | -0.77 | 6.45  | lymphocyte-activation gene 3                                                            |
| Kctd12        | 239217 | -0.77 | 9.11  | potassium channel tetramerisation domain containing 12                                  |
| Igsf4a        | 54725  | -0.77 | 2.77  | immunoglobulin superfamily, member 4A                                                   |
| Igh-VJ558     | 16061  | -0.77 | -4.23 | immunoglobulin heavy chain (J558 family)                                                |
| Hsd17b4       | 15488  | -0.77 | 6.24  | hydroxysteroid (17-beta) dehydrogenase 4                                                |
| Cd86          | 12524  | -0.77 | 10.94 | CD86 antigen                                                                            |
| Cbfa2t3h      | 12398  | -0.77 | 12.79 | core-binding factor, runt domain, alpha subunit 2, translocated to, 3 homolog (human)   |
| Bcl2a1b       | 12045  | -0.77 | 2.71  | B-cell leukemia/lymphoma 2 related protein A1b                                          |
| Avp1          | 69534  | -0.77 | 5.22  | arginine vasopressin-induced 1                                                          |
| A930004K21Rik | 228564 | -0.77 | 6.07  | RIKEN cDNA A930004K21 gene                                                              |
| Usp12         | 22217  | -0.76 | 2.51  | ubiquitin specific protease 12                                                          |
| Tgm2          | NA     | -0.76 | 9.91  | Mus musculus transglutaminase 2, C polypeptide (Tgm2), mRNA.                            |
| St14          | 19143  | -0.76 | 6.97  | suppression of tumorigenicity 14 (colon carcinoma)                                      |
| Rassf4        | NA     | -0.76 | 6.51  | Mus musculus Ras association (RalGDS/AF-6) domain family 4 (Rassf4), mRNA.              |
| Pla2g7        | 27226  | -0.76 | 7.96  | phospholipase A2, group VII (platelet-activating factor acetylhydrolase, plasma)        |
| LOC193676     | 193676 | -0.76 | 7.76  | hypothetical protein LOC193676                                                          |
| Igk-V21       | 16098  | -0.76 | -3.15 | immunoglobulin kappa chain variable 21 (V21)                                            |
| Blk           | 12229  | -0.76 | 11.24 | Bruton agammaglobulinemia tyrosine kinase                                               |
| Bcl2a1d       | 12047  | -0.76 | 4.23  | B-cell leukemia/lymphoma 2 related protein A1d                                          |
| 2900046G09Rik | 78408  | -0.76 | 8.24  | RIKEN cDNA 2900046G09 gene                                                              |
| 2810048G17Rik | 72691  | -0.76 | 6.14  | RIKEN cDNA 2810048G17 gene                                                              |
| 2310009N05Rik | 66943  | -0.76 | 9.43  | RIKEN cDNA 2310009N05 gene                                                              |
| Syk           | 20963  | -0.75 | 12.09 | spleen tyrosine kinase                                                                  |
| Npc1          | 18145  | -0.75 | 4.51  | Niemann Pick type C1                                                                    |
| Lair1         | 52855  | -0.75 | 0.9   | leukocyte-associated Ig-like receptor 1                                                 |
| Kira22        | 93969  | -0.75 | -0.51 | killer cell lectin-like receptor subfamily A, member 22                                 |
| IGHV1S132     | NA     | -0.75 | 2.1   | Mus musculus clone J558.h immunoglobulin heavy chain variable region gene, partial cds. |
| Hpgd          | 15446  | -0.75 | 3.78  | hydroxyprostaglandin dehydrogenase 15 (NAD)                                             |
| Gpr3          | 14748  | -0.75 | 0.73  | G-protein coupled receptor 3                                                            |
| Esam1         | 69524  | -0.75 | 4.4   | endothelial cell-specific adhesion molecule                                             |
| Ear3          | 53876  | -0.75 | 1.2   | eosinophil-associated, ribonuclease A family, member 3                                  |
| Dok1          | 13448  | -0.75 | 2.92  | docking protein 1                                                                       |
| Btb4          | 72147  | -0.75 | 5.43  | BTB (POZ) domain containing 4                                                           |
| A530090P03Rik | 320407 | -0.75 | 5.36  | RIKEN cDNA A530090P03 gene                                                              |
| 6430402L03Rik | 331474 | -0.75 | 9.22  | RIKEN cDNA 6430402L03 gene                                                              |
| 1810037B05Rik | 69169  | -0.75 | 12.99 | RIKEN cDNA 1810037B05 gene                                                              |
| Tnni2         | 21953  | -0.74 | 10.31 | troponin I, skeletal, fast 2                                                            |
| Syngr2        | 20973  | -0.74 | 6.07  | synaptogyrin 2                                                                          |
| Samd7         | 75953  | -0.74 | 3.2   | sterile alpha motif domain containing 7                                                 |
| Rgs2          | 19735  | -0.74 | 7.88  | regulator of G-protein signaling 2                                                      |
| Pboxip1       | 229534 | -0.74 | -4.38 | pre-B-cell leukemia transcription factor interacting protein 1                          |
| Nav1          | 215690 | -0.74 | 8.29  | neuron navigator 1                                                                      |
| Napsa         | 16541  | -0.74 | 12.31 | napsin A aspartic peptidase                                                             |
| IGHV1S33      | NA     | -0.74 | 0.96  | Mouse germline immunoglobulin V(H)II gene H13-1.                                        |
| Icsbp1        | 15900  | -0.74 | 4.16  | interferon consensus sequence binding protein 1                                         |
| Cyflp1        | 20430  | -0.74 | 14.54 | cytoplasmic FMR1 interacting protein 1                                                  |
| C330023F11Rik | 109232 | -0.74 | 7.6   | RIKEN cDNA C330023F11 gene                                                              |
| B130050K08    | 224180 | -0.74 | 8.4   | hypothetical protein B130050K08                                                         |
| Alox5ap       | 11690  | -0.74 | 6.53  | arachidonate 5-lipoxygenase activating protein                                          |
| 6530404N21Rik | 67795  | -0.74 | 1.19  | RIKEN cDNA 6530404N21 gene                                                              |
| 1110060M21Rik | 66208  | -0.74 | 6.67  | RIKEN cDNA 1110060M21 gene                                                              |
| Torg-V4       | 21638  | -0.73 | 2.71  | T-cell receptor gamma, variable 4                                                       |
| Snx8          | 231834 | -0.73 | 6.09  | sorting nexin 8                                                                         |
| Slc2a6        | 227659 | -0.73 | 10.84 | solute carrier family 2 (facilitated glucose transporter), member 6                     |
| Rgl1          | 19731  | -0.73 | 7.35  | ral guanine nucleotide dissociation stimulator,-like 1                                  |
| Mip           | 17357  | -0.73 | 13.61 | MARCKS-like protein                                                                     |
| Lyn           | 17096  | -0.73 | 6.32  | Yamaguchi sarcoma viral (y-ves-1) oncogene homolog                                      |
| Kira1         | 16627  | -0.73 | 0.1   | killer cell lectin-like receptor, subfamily A, member 1                                 |
| Gng10         | 14700  | -0.73 | 6.78  | guanine nucleotide binding protein (G protein), gamma 10                                |
| Gadd45b       | 17873  | -0.73 | 11.79 | growth arrest and DNA-damage-inducible 45 beta                                          |
| Egr2          | 13654  | -0.73 | 6.59  | early growth response 2                                                                 |
| Cnr2          | 12802  | -0.73 | 9.43  | cannabinoid receptor 2 (macrophage)                                                     |
| AA960558      | 101476 | -0.73 | 8.38  | expressed sequence AA960558                                                             |
| 1810054O13Rik | 67893  | -0.73 | 7.4   | RIKEN cDNA 1810054O13 gene                                                              |
| Tnfrsf5       | NA     | -0.72 | 9.28  | Mus musculus tumor necrosis factor receptor superfamily, member 5 (Tnfrsf5), mRNA.      |
| Tmprss8       | 30943  | -0.72 | 18.92 | transmembrane protease, serine 8 (intestinal)                                           |
| Tlr7          | 170743 | -0.72 | 4.46  | toll-like receptor 7                                                                    |
| Snn           | 20621  | -0.72 | 4.98  | stannin                                                                                 |
| P2ry6         | 233571 | -0.72 | 13.74 | pyrimidergic receptor P2Y, G-protein coupled, 6                                         |
| Hgfac         | 54426  | -0.72 | 7.8   | hepatocyte growth factor activator                                                      |
| Gpr126        | 215798 | -0.72 | 3.68  | G protein-coupled receptor 126                                                          |
| Egfl4         | 269878 | -0.72 | 5.1   | EGF-like-domain, multiple 4                                                             |
| D930007M16Rik | 319417 | -0.72 | -0.86 | RIKEN cDNA D930007M16 gene                                                              |
| Bcl2a1a       | 12044  | -0.72 | 3.95  | B-cell leukemia/lymphoma 2 related protein A1a                                          |
| BC065078      | 225912 | -0.72 | 6.29  | cDNA sequence BC065078                                                                  |
| A530023O14Rik | 244183 | -0.72 | 9.76  | RIKEN cDNA A530023O14 gene                                                              |
| 4933415L06Rik | 108811 | -0.72 | 2.49  | RIKEN cDNA 4933415L06 gene                                                              |
| Torg-V2       | 21636  | -0.71 | -1.03 | T-cell receptor gamma, variable 2                                                       |
| Syngr2        | 20973  | -0.71 | 6.05  | synaptogyrin 2                                                                          |
| Spire1        | 68166  | -0.71 | 9.62  | spire homolog 1 (Drosophila)                                                            |
| Sh3tc1        | 231147 | -0.71 | 7.63  | SH3 domain and tetra-tricopeptide repeats 1                                             |
| Sell          | 20343  | -0.71 | 1.9   | selectin, lymphocyte                                                                    |
| Mefv          | 54483  | -0.71 | 5.46  | Mediterranean fever                                                                     |
| Lair1         | 52855  | -0.71 | 2.42  | leukocyte-associated Ig-like receptor 1                                                 |
| li            | 16149  | -0.71 | 0.51  | Ia-associated invariant chain                                                           |
| Igk-V5        | 381777 | -0.71 | 1.23  | immunoglobulin kappa chain variable 5 (V5 family)                                       |
| Icam1         | 15894  | -0.71 | 10.31 | intercellular adhesion molecule                                                         |
| Hoxa7         | 15404  | -0.71 | 6.53  | homeo box A7                                                                            |



Table S1B

|               |        |       |       |                                                                                          |
|---------------|--------|-------|-------|------------------------------------------------------------------------------------------|
| Hk2           | 15277  | -0.71 | 9.94  | hexokinase 2                                                                             |
| Edg2          | 14745  | -0.71 | 4.12  | endothelial differentiation, lysophosphatidic acid G-protein-coupled receptor, 2         |
| D130019J16Rik | 320171 | -0.71 | -0.61 | RIKEN cDNA D130019J16 gene                                                               |
| C230090D14    | 270198 | -0.71 | 3.16  | hypothetical protein C230090D14                                                          |
| AW742481      | 101013 | -0.71 | 9.71  | expressed sequence AW742481                                                              |
| Atbf1         | 11906  | -0.71 | 8.37  | AT motif binding factor 1                                                                |
| 9930027N05Rik | NA     | -0.71 | 7.18  | Mus musculus RIKEN cDNA 9930027N05 gene (9930027N05Rik), transcript variant 1, mRNA.     |
| 5830436119Rik | 319946 | -0.71 | -0.85 | RIKEN cDNA 5830436119 gene                                                               |
| 2410004L22Rik | 76478  | -0.71 | 5     | RIKEN cDNA 2410004L22 gene                                                               |
| Tpd52         | 21985  | -0.7  | 13.54 | tumor protein D52                                                                        |
| Shb           | 230126 | -0.7  | 9.57  | src homology 2 domain-containing transforming protein B                                  |
| Pfk1          | 18647  | -0.7  | 10.99 | PFTAIRE protein kinase 1                                                                 |
| Pfkfb3        | 170768 | -0.7  | 10.55 | 6-phosphofructo-2-kinase/fructose-2,6-bisphosphatase 3                                   |
| Jag1          | 16449  | -0.7  | 6.17  | jagged 1                                                                                 |
| Il1r2         | 16178  | -0.7  | 3.57  | interleukin 1 receptor, type II                                                          |
| Ifitm3        | 66141  | -0.7  | 7.12  | interferon induced transmembrane protein 3                                               |
| H2-Ab1        | 14961  | -0.7  | 0.61  | histocompatibility 2, class II antigen A, beta 1                                         |
| Eif2ak4       | 27103  | -0.7  | 9.45  | eukaryotic translation initiation factor 2 alpha kinase 4                                |
| Dusp16        | 70686  | -0.7  | 7.38  | dual specificity phosphatase 16                                                          |
| Csen          | 56461  | -0.7  | 10.31 | calseinilin, presenilin binding protein, EF hand transcription factor                    |
| Cd79b         | 15985  | -0.7  | 6.86  | CD79B antigen                                                                            |
| BC013667      | 226856 | -0.7  | 7.7   | cDNA sequence BC013667                                                                   |
| AV216087      | 211896 | -0.7  | 6.9   | expressed sequence AV216087                                                              |
| Acvr1         | 11477  | -0.7  | 2.28  | activin A receptor, type 1                                                               |
| A230020G22Rik | NA     | -0.7  | 4.23  | Mus musculus RIKEN cDNA A230020G22 gene (A230020G22Rik), mRNA.                           |
| 2900026A02Rik | 243219 | -0.7  | 11.06 | RIKEN cDNA 2900026A02 gene                                                               |
| Stk32c        | 57740  | -0.69 | 8.63  | serine/threonine kinase 32C                                                              |
| Sh3bp2        | 24055  | -0.69 | 10.02 | SH3-domain binding protein 2                                                             |
| Scrg3         | 20286  | -0.69 | 3.13  | scrapie responsive gene 3                                                                |
| Sod1          | 20249  | -0.69 | 3.92  | stearyl-Coenzyme A desaturase 1                                                          |
| Procr         | 19124  | -0.69 | -1.84 | protein C receptor, endothelial                                                          |
| Ppp1r14a      | NA     | -0.69 | 6.42  | Mus musculus protein phosphatase 1, regulatory (inhibitor) subunit 14A (Ppp1r14a), mRNA. |
| Mgmt          | 17314  | -0.69 | 2.13  | O-6-methylguanine-DNA methyltransferase                                                  |
| IGKV8-21      | NA     | -0.69 | -2.86 | Mus musculus V kappa 8-21 gene, partial.                                                 |
| Haa0          | 107766 | -0.69 | 9.12  | 3-hydroxyanthranilate 3,4-dioxygenase                                                    |
| Gga2          | 74105  | -0.69 | 9.47  | golgi associated, gamma adaptin ear containing, ARF binding protein 2                    |
| Dst           | NA     | -0.69 | 2.32  | Mus musculus dystonin (Dst), mRNA.                                                       |
| Btb4          | 72147  | -0.69 | 10.07 | BTB (POZ) domain containing 4                                                            |
| Bruno4        | 108013 | -0.69 | 9.02  | bruno-like 4, RNA binding protein (Drosophila)                                           |
| AL024069      | 98496  | -0.69 | 15.99 | expressed sequence AL024069                                                              |
| A430106J12Rik | NA     | -0.69 | 10.93 | Mus musculus RIKEN cDNA A430106J12 gene (A430106J12Rik), mRNA.                           |
| 1100001119Rik | 244745 | -0.69 | 5.62  | RIKEN cDNA 1100001119 gene                                                               |
| Zfp361        | 12192  | -0.68 | 12.05 | zinc finger protein 36, C3H type-like 1                                                  |
| Uvrug1        | 78610  | -0.68 | 2.01  | UV radiation resistance associated gene                                                  |
| Ugt1a13       | 394430 | -0.68 | 10.94 | UDP glycosyltransferase 1 family polypeptide A13                                         |
| Slc38a2       | 67760  | -0.68 | 11.84 | solute carrier family 38, member 2                                                       |
| Relb          | 19698  | -0.68 | 7.23  | avian reticuloendotheliosis viral (v-rel) oncogene related B                             |
| Plac8         | 231507 | -0.68 | 0.64  | placenta-specific 8                                                                      |
| Hps5          | 246694 | -0.68 | 5.64  | Hermansky-Pudlak syndrome 5 homolog (human)                                              |
| Fcer2a        | 14128  | -0.68 | 10.69 | Fc receptor, IgE, low affinity II, alpha polypeptide                                     |
| Dscam         | 13508  | -0.68 | 15.14 | Down syndrome cell adhesion molecule                                                     |
| Cri1          | 58521  | -0.68 | 4.35  | CREBBP/EP300 inhibitory protein 1                                                        |
| BC032935      | 270103 | -0.68 | 1.87  | cDNA sequence BC032935                                                                   |
| 4631426J05Rik | 77590  | -0.68 | 8.94  | RIKEN cDNA 4631426J05 gene                                                               |
| 1110012005Rik | 66158  | -0.68 | 11.37 | RIKEN cDNA 1110012005 gene                                                               |
| Zfp238        | 30928  | -0.67 | 2.17  | zinc finger protein 238                                                                  |
| Slco5a1       | 240726 | -0.67 | 2.8   | solute carrier organic anion transporter family, member 5A1                              |
| Sall2         | 50524  | -0.67 | 7.49  | sal-like 2 (Drosophila)                                                                  |
| Ryr1          | 20190  | -0.67 | 9.41  | ryanodine receptor 1, skeletal muscle                                                    |
| Rassf4        | 213391 | -0.67 | 11.33 | Ras association (RalGDS/AF-6) domain family 4                                            |
| LOC73899      | 73899  | -0.67 | 5.75  | hypothetical LOC73899                                                                    |
| Kira21        | 93968  | -0.67 | 0.77  | killer cell lectin-like receptor subfamily A, member 21                                  |
| Keo4          | 226144 | -0.67 | 8.46  | similar to Caenorhabditis elegans protein C42C1.9                                        |
| Ear6          | 93719  | -0.67 | 0.03  | eosinophil-associated, ribonuclease A family, member 6                                   |
| Ctsz          | 64138  | -0.67 | 6.1   | cathepsin Z                                                                              |
| A1115600      | 102442 | -0.67 | 2.93  | expressed sequence A1115600                                                              |
| A230020G22Rik | 229499 | -0.67 | 12.35 | RIKEN cDNA A230020G22 gene                                                               |
| 2900076A13Rik | 73002  | -0.67 | 7.13  | RIKEN cDNA 2900076A13 gene                                                               |
| Upb1          | 103149 | -0.66 | 5.96  | ureidopropionase, beta                                                                   |
| Sart2         | 212898 | -0.66 | 4.49  | squamous cell carcinoma antigen recognized by T cells 2                                  |
| Samsn1        | 67742  | -0.66 | 3.18  | SAM domain, SH3 domain and nuclear localisation signals, 1                               |
| Prkcd         | 18753  | -0.66 | 7.27  | protein kinase C, delta                                                                  |
| Lst1          | 16988  | -0.66 | 2.94  | leukocyte specific transcript 1                                                          |
| Klrd1         | 16643  | -0.66 | 1.88  | killer cell lectin-like receptor, subfamily D, member 1                                  |
| Il10ra        | 16154  | -0.66 | 3.97  | interleukin 10 receptor, alpha                                                           |
| Hist1h2bc     | 68024  | -0.66 | 4.99  | histone 1, H2bc                                                                          |
| Gpr83         | 14608  | -0.66 | 5.97  | G protein-coupled receptor 83                                                            |
| Gkap1         | 56278  | -0.66 | 5.59  | G kinase anchoring protein 1                                                             |
| Entpd1        | 12495  | -0.66 | 7.07  | ectonucleoside triphosphate diphosphohydrolase 1                                         |
| Ctla4         | 12477  | -0.66 | 1.71  | cytotoxic T-lymphocyte-associated protein 4                                              |
| Cst3          | 13010  | -0.66 | 5.94  | cystatin C                                                                               |
| Cd2ap         | 12488  | -0.66 | 10.26 | CD2-associated protein                                                                   |
| C80638        | 97086  | -0.66 | 0.98  | expressed sequence C80638                                                                |
| C030044C12Rik | 77483  | -0.66 | 2.91  | RIKEN cDNA C030044C12 gene                                                               |
| Aif1          | 11629  | -0.66 | 2.13  | allograft inflammatory factor 1                                                          |
| 9130403I23Rik | 71585  | -0.66 | 2.56  | RIKEN cDNA 9130403I23 gene                                                               |
| 5830462O15Rik | 76110  | -0.66 | -1.62 | RIKEN cDNA 5830462O15 gene                                                               |
| 4921501M20Rik | 74039  | -0.66 | 6.1   | RIKEN cDNA 4921501M20 gene                                                               |
| Zfp263        | 74120  | -0.65 | 5.91  | zinc finger protein 263                                                                  |
| Sumf1         | 58911  | -0.65 | 10.14 | sulfatase modifying factor 1                                                             |
| Pira5         | 18728  | -0.65 | 8.41  | paired-Ig-like receptor A5                                                               |
| Myo1b         | 17912  | -0.65 | 10.42 | myosin IB                                                                                |

Table S1B

|               |        |       |       |                                                                                          |
|---------------|--------|-------|-------|------------------------------------------------------------------------------------------|
| Mef2c         | 17260  | -0.65 | 6.72  | myocyte enhancer factor 2C                                                               |
| LincR         | 214854 | -0.65 | 9.95  | lung-inducible neuralized-related C3HC4 RING domain protein                              |
| H2-Ob         | 15002  | -0.65 | 3.17  | histocompatibility 2, O region beta locus                                                |
| Gngt2         | 14710  | -0.65 | 5.01  | guanine nucleotide binding protein (G protein), gamma transducing activity polypeptide 2 |
| Col12a1       | 12816  | -0.65 | 7.64  | procollagen, type XII, alpha 1                                                           |
| Adssl1        | 11565  | -0.65 | 5.66  | adenylosuccinate synthetase like 1                                                       |
| A930041H05Rik | 77834  | -0.65 | 3.29  | RIKEN cDNA A930041H05 gene                                                               |
| 4933431N12Rik | 71310  | -0.65 | 11.1  | RIKEN cDNA 4933431N12 gene                                                               |
| 4833418N02Rik | 74597  | -0.65 | 7.14  | RIKEN cDNA 4833418N02 gene                                                               |
| Tnfrsf5       | 21939  | -0.64 | 10    | tumor necrosis factor receptor superfamily, member 5                                     |
| Rnf130        | 59044  | -0.64 | 13.81 | ring finger protein 130                                                                  |
| Rassf4        | 213391 | -0.64 | 7.55  | Ras association (RalGDS/AF-6) domain family 4                                            |
| Luc7l2        | 192196 | -0.64 | 0.97  | LUC7-like 2 (S. cerevisiae)                                                              |
| IGKV8-30      | NA     | -0.64 | -1.99 | Mus musculus IgVk 8-30 gene.                                                             |
| Igj           | 16069  | -0.64 | -2.95 | immunoglobulin joining chain                                                             |
| Gns           | 75612  | -0.64 | 8.08  | glucosamine (N-acetyl)-6-sulfatase                                                       |
| Ephx1         | 13849  | -0.64 | 2.57  | epoxide hydrolase 1, microsomal                                                          |
| E130014J05Rik | 214133 | -0.64 | 6.49  | RIKEN cDNA E130014J05 gene                                                               |
| Dusp16        | NA     | -0.64 | 8.33  | Mus musculus dual specificity phosphatase 16 (Dusp16), mRNA.                             |
| D4st1         | 72136  | -0.64 | 4.66  | dermatan 4 sulfotransferase 1                                                            |
| 5033403D15Rik | 240024 | -0.64 | 7.48  | RIKEN cDNA 5033403D15 gene                                                               |
| Wbscr5        | 56743  | -0.63 | 8.02  | Williams-Beuren syndrome chromosome region 5 homolog (human)                             |
| Tex2          | 21763  | -0.63 | 2.84  | testis expressed gene 2                                                                  |
| Soat1         | 20652  | -0.63 | 6.72  | sterol O-acyltransferase 1                                                               |
| Slc30a4       | 22785  | -0.63 | -0.64 | solute carrier family 30 (zinc transporter), member 4                                    |
| Rgs1          | 50778  | -0.63 | 6.75  | regulator of G-protein signaling 1                                                       |
| Ptger3        | NA     | -0.63 | 3.46  | Mus musculus prostaglandin E receptor 3 (subtype EP3) (Ptger3), mRNA.                    |
| Pira6         | 18729  | -0.63 | 3.76  | paired-Ig-like receptor A6                                                               |
| Pira2         | 18725  | -0.63 | 10.45 | paired-Ig-like receptor A2                                                               |
| Nfkbi2        | 80859  | -0.63 | 4.56  | nuclear factor of kappa light polypeptide gene enhancer in B-cells inhibitor, zeta       |
| Myadm         | 50918  | -0.63 | 10.48 | myeloid-associated differentiation marker                                                |
| Man2b1        | 17159  | -0.63 | 6.29  | mannosidase 2, alpha B1                                                                  |
| Hcph          | 15170  | -0.63 | 1.8   | hemopoietic cell phosphatase                                                             |
| Gria3         | 53623  | -0.63 | 1.23  | glutamate receptor, ionotropic, AMPA3 (alpha 3)                                          |
| Gpr35         | 64095  | -0.63 | 11.21 | G protein-coupled receptor 35                                                            |
| Gpr34         | 23890  | -0.63 | 2.66  | G protein-coupled receptor 34                                                            |
| D17H6S56E-5   | 110956 | -0.63 | 6.32  | DNA segment, Chr 17, human D6S56E 5                                                      |
| Cox6a2        | 12862  | -0.63 | 1.64  | cytochrome c oxidase, subunit VI a, polypeptide 2                                        |
| Cklfsf3       | 68119  | -0.63 | 4.75  | chemokine-like factor super family 3                                                     |
| Asah1         | 67111  | -0.63 | 6.53  | N-acylsphingosine amidohydrolase (acid ceramidase)-like                                  |
| A230102O09Rik | 98354  | -0.63 | 2.48  | RIKEN cDNA A230102O09 gene                                                               |
| 4930429A08Rik | 74648  | -0.63 | 6.37  | RIKEN cDNA 4930429A08 gene                                                               |
| 4930403L05Rik | 67395  | -0.63 | 13.14 | RIKEN cDNA 4930403L05 gene                                                               |
| 4733401I05Rik | 70848  | -0.63 | 1.83  | RIKEN cDNA 4733401I05 gene                                                               |
| 2210406H18Rik | 70133  | -0.63 | 9.81  | RIKEN cDNA 2210406H18 gene                                                               |
| Tgm2          | 21817  | -0.62 | 4.73  | transglutaminase 2, C polypeptide                                                        |
| Sox4          | 20677  | -0.62 | -0.91 | SRY-box containing gene 4                                                                |
| Rnf13         | 24017  | -0.62 | 11.55 | ring finger protein 13                                                                   |
| Ptpre         | 19267  | -0.62 | 11.54 | protein tyrosine phosphatase, receptor type, E                                           |
| Parc          | 78309  | -0.62 | 8.4   | p53-associated parkin-like cytoplasmic protein                                           |
| Napsa         | NA     | -0.62 | 0.4   | Mus musculus napsin A aspartic peptidase (Napsa), mRNA.                                  |
| Ms4a6c        | 73656  | -0.62 | 7.18  | membrane-spanning 4-domains, subfamily A, member 6C                                      |
| Lrp1          | 16971  | -0.62 | 6.56  | low density lipoprotein receptor-related protein 1                                       |
| Lmyc1         | 16918  | -0.62 | 6.79  | lung carcinoma myc related oncogene 1                                                    |
| Klk6          | 16612  | -0.62 | 1.38  | kallikrein 6                                                                             |
| H2-Ab1        | 14961  | -0.62 | -0.44 | histocompatibility 2, class II antigen A, beta 1                                         |
| Gp2           | 67133  | -0.62 | 7.76  | glycoprotein 2 (zymogen granule membrane)                                                |
| E130103117Rik | 319845 | -0.62 | 8.92  | RIKEN cDNA E130103117 gene                                                               |
| D330017J20Rik | 320609 | -0.62 | 14.66 | RIKEN cDNA D330017J20 gene                                                               |
| Cr2           | 12902  | -0.62 | 6.79  | complement receptor 2                                                                    |
| Cdh1          | 12550  | -0.62 | -3.22 | cadherin 1                                                                               |
| Cd244         | 18106  | -0.62 | 13.98 | CD244 natural killer cell receptor 2B4                                                   |
| Cbr3          | 109857 | -0.62 | 9.25  | carbonyl reductase 3                                                                     |
| Catna1        | 12385  | -0.62 | 4.42  | catenin alpha 1                                                                          |
| BC027057      | 212937 | -0.62 | 14.28 | cDNA sequence BC027057                                                                   |
| BC004728      | 207818 | -0.62 | 8.84  | cDNA sequence BC004728                                                                   |
| Abi3          | 66610  | -0.62 | 4.15  | ABI gene family, member 3                                                                |
| Abca9         | 217262 | -0.62 | 6.57  | ATP-binding cassette transporter sub-family A member 9                                   |
| 9830005G06Rik | 232414 | -0.62 | 4.61  | RIKEN cDNA 9830005G06 gene                                                               |
| 9630007J19Rik | 102493 | -0.62 | 8.5   | RIKEN cDNA 9630007J19 gene                                                               |
| 2300003P22Rik | 67855  | -0.62 | 8.33  | RIKEN cDNA 2300003P22 gene                                                               |
| Swap70        | 20947  | -0.61 | 4.93  | SWAP complex protein                                                                     |
| Spint1        | 20732  | -0.61 | 2.59  | serine protease inhibitor, Kunitz type 1                                                 |
| Plexnb2       | 140570 | -0.61 | 5.87  | plexin B2                                                                                |
| Pira3         | 18726  | -0.61 | 9.13  | paired-Ig-like receptor A3                                                               |
| Nav1          | 215690 | -0.61 | 6.2   | neuron navigator 1                                                                       |
| Mtmr13        | 319934 | -0.61 | -0.26 | myotubularin related protein 13                                                          |
| Kit           | 16590  | -0.61 | 4.69  | kit oncogene                                                                             |
| Ifitm1        | 68713  | -0.61 | 3.45  | interferon induced transmembrane protein 1                                               |
| Dusp9         | 75590  | -0.61 | 2.93  | dual specificity phosphatase 9                                                           |
| Cdkn2b        | 12579  | -0.61 | 11.25 | cyclin-dependent kinase inhibitor 2B (p15, inhibits CDK4)                                |
| Cr5           | 12774  | -0.61 | 2.15  | chemokine (C-C motif) receptor 5                                                         |
| BC013481      | NA     | -0.61 | 0.53  | Mus musculus cDNA sequence BC013481 (BC013481), mRNA.                                    |
| Adam4         | 11498  | -0.61 | 8.78  | a disintegrin and metalloprotease domain 4                                               |
| 5830456J23Rik | 76105  | -0.61 | 2.49  | RIKEN cDNA 5830456J23 gene                                                               |
| Tusc1         | 69136  | -0.6  | 11.11 | tumor suppressor candidate 1                                                             |
| Tnfrsf19l     | 320100 | -0.6  | 11.43 | tumor necrosis factor receptor superfamily, member 19-like                               |
| Stx7          | 53331  | -0.6  | 3.44  | syntaxin 7                                                                               |
| Soat1         | 20652  | -0.6  | 3.86  | sterol O-acyltransferase 1                                                               |
| Sgk3          | 170755 | -0.6  | 4.55  | serum/glucocorticoid regulated kinase 3                                                  |
| Rfx5          | 53970  | -0.6  | 5.81  | regulatory factor X, 5 (influences HLA class II expression)                              |
| Prkcb1        | 18751  | -0.6  | 8.56  | protein kinase C, beta 1                                                                 |

Table S1B

|               |        |       |       |                                                                                                |
|---------------|--------|-------|-------|------------------------------------------------------------------------------------------------|
| Plek          | 56193  | -0.6  | 10.67 | pleckstrin                                                                                     |
| Pira7         | 18730  | -0.6  | 7.03  | paired-Ig-like receptor A7                                                                     |
| Pglyrp1       | 21946  | -0.6  | 0.93  | peptidoglycan recognition protein 1                                                            |
| Pascin1       | 23969  | -0.6  | 3.62  | protein kinase C and casein kinase substrate in neurons 1                                      |
| Myb           | 17863  | -0.6  | -1.08 | myeloblastosis oncogene                                                                        |
| Mmp9          | 17395  | -0.6  | 2.21  | matrix metalloproteinase 9                                                                     |
| Mmd           | 67468  | -0.6  | 2.12  | monocyte to macrophage differentiation-associated                                              |
| Malt1         | 240354 | -0.6  | 3.58  | mucosa associated lymphoid tissue lymphoma translocation gene 1                                |
| Lyl1          | 17095  | -0.6  | 10.38 | lymphoblastic leukemia                                                                         |
| Kira17        | 170733 | -0.6  | 4.14  | killer cell lectin-like receptor, subfamily A, member 17                                       |
| Igk-V8        | 384422 | -0.6  | -4.7  | immunoglobulin kappa chain variable 8 (V8)                                                     |
| Gm            | 14824  | -0.6  | 0.85  | granulin                                                                                       |
| Gata4         | 14463  | -0.6  | 5.78  | GATA binding protein 4                                                                         |
| Dfy           | 13349  | -0.6  | 5.32  | Duffy blood group                                                                              |
| Chst7         | 60322  | -0.6  | 5.89  | carbohydrate (N-acetylglucosamino) sulfotransferase 7                                          |
| BC028528      | 229600 | -0.6  | 4.47  | cDNA sequence BC028528                                                                         |
| Asah1         | 11886  | -0.6  | 9.6   | N-acylsphingosine amidohydrolase 1                                                             |
| A530023O14Rik | 244183 | -0.6  | 10.02 | RIKEN cDNA A530023O14 gene                                                                     |
| A030011A13Rik | 319515 | -0.6  | 2.08  | RIKEN cDNA A030011A13 gene                                                                     |
| 6530401C20Rik | 231842 | -0.6  | 9.71  | RIKEN cDNA 6530401C20 gene                                                                     |
| 4631422O05Rik | 78749  | -0.6  | 5.44  | RIKEN cDNA 4631422O05 gene                                                                     |
| 1810009J06Rik | 73626  | -0.6  | 9.79  | RIKEN cDNA 1810009J06 gene                                                                     |
| Tfb2m         | 15278  | -0.59 | 6.46  | transcription factor B2, mitochondrial                                                         |
| Tceal8        | 66684  | -0.59 | 9.14  | transcription elongation factor A (SII)-like 8                                                 |
| Rel           | 19696  | -0.59 | 8.63  | reticuloendotheliosis oncogene                                                                 |
| Pdcd11g1      | 60533  | -0.59 | 9.36  | programmed cell death 1 ligand 1                                                               |
| Nalp10        | 244202 | -0.59 | 6.1   | NACHT, leucine rich repeat and PYD containing 10                                               |
| Man2b1        | 17159  | -0.59 | 3.87  | mannosidase 2, alpha B1                                                                        |
| LOC56304      | 56304  | -0.59 | -0.68 | recombinant antineuraminidase single chain Ig VH and VL domains                                |
| L259          | NA     | -0.59 | 7.43  | Mus musculus L259 (L259), mRNA.                                                                |
| Klk5          | 16622  | -0.59 | 1.74  | kallikrein 5                                                                                   |
| IGKV1-115     | NA     | -0.59 | 0.37  | Mus musculus IgVκ cz1 pseudogene.                                                              |
| Igk-V1        | 16081  | -0.59 | 3.29  | immunoglobulin kappa chain variable 1 (V1)                                                     |
| Ifi30         | NA     | -0.59 | 3.34  | Mus musculus interferon gamma inducible protein 30 (Ifi30), mRNA.                              |
| Hspa5bp1      | 98170  | -0.59 | 10.92 | heat shock 70kDa protein 5 binding protein 1                                                   |
| Fut4          | 14345  | -0.59 | 7.78  | fucosyltransferase 4                                                                           |
| Entpd1        | 12495  | -0.59 | 9.05  | ectonucleoside triphosphate diphosphohydrolase 1                                               |
| Dusp22        | 105352 | -0.59 | 12.56 | dual specificity phosphatase 22                                                                |
| Cyp4f18       | 72054  | -0.59 | 5.49  | cytochrome P450, family 4, subfamily f, polypeptide 18                                         |
| Cyp4f16       | 70101  | -0.59 | 1.5   | cytochrome P450, family 4, subfamily f, polypeptide 16                                         |
| A630038E17Rik | 219065 | -0.59 | 4.88  | RIKEN cDNA A630038E17 gene                                                                     |
| 9530009G21Rik | 320305 | -0.59 | 3.03  | RIKEN cDNA 9530009G21 gene                                                                     |
| 6720401G13Rik | 103012 | -0.59 | 1.81  | RIKEN cDNA 6720401G13 gene                                                                     |
| 6330415F13Rik | 70747  | -0.59 | 5.92  | RIKEN cDNA 6330415F13 gene                                                                     |
| 5730496F10Rik | 70604  | -0.59 | 4.54  | RIKEN cDNA 5730496F10 gene                                                                     |
| 4930527B16Rik | 75834  | -0.59 | 4.21  | RIKEN cDNA 4930527B16 gene                                                                     |
| 2810465F10Rik | 78771  | -0.59 | 4.23  | RIKEN cDNA 2810465F10 gene                                                                     |
| Hsd11b1       | NA     | 0.59  | 2.55  | Mus musculus hydroxysteroid 11-beta dehydrogenase 1 (Hsd11b1), mRNA.                           |
| H2-Q10        | 15007  | 0.59  | 1.2   | histocompatibility 2, Q region locus 10                                                        |
| Gzmk          | 14945  | 0.59  | -3.67 | granzyme K                                                                                     |
| Golph2        | 105348 | 0.59  | 11.99 | golgi phosphoprotein 2                                                                         |
| Entpd5        | 12499  | 0.59  | 5.22  | ectonucleoside triphosphate diphosphohydrolase 5                                               |
| Eef2          | NA     | 0.59  | 5.2   | Mus musculus eukaryotic translation elongation factor 2 (Eef2), mRNA.                          |
| Eef2          | 13629  | 0.59  | 3.84  | eukaryotic translation elongation factor 2                                                     |
| Cspg6         | 13006  | 0.59  | 0.56  | chondroitin sulfate proteoglycan 6                                                             |
| Cd3z          | 12503  | 0.59  | 5.47  | CD3 antigen, zeta polypeptide                                                                  |
| Art4          | 109978 | 0.59  | 8.93  | ADP-ribosyltransferase 4                                                                       |
| A130096G17Rik | 319725 | 0.59  | 1.46  | RIKEN cDNA A130096G17 gene                                                                     |
| Ubash3a       | 328795 | 0.6   | 1.34  | ubiquitin associated and SH3 domain containing, A                                              |
| Tmem23        | 208449 | 0.6   | 5.44  | transmembrane protein 23                                                                       |
| Prkx          | 19108  | 0.6   | 2.49  | protein kinase, X-linked                                                                       |
| Lrrc6         | 54562  | 0.6   | -0.27 | leucine rich repeat containing 6 (testis)                                                      |
| Gp49a         | 14727  | 0.6   | 6.11  | glycoprotein 49 A                                                                              |
| Cd28          | NA     | 0.6   | 5.97  | Mus musculus CD28 antigen (Cd28), mRNA.                                                        |
| Capn2         | 12334  | 0.6   | 5.52  | calpain 2                                                                                      |
| Bcl2          | NA     | 0.6   | 2.45  | Mus musculus B-cell leukemia/lymphoma 2 (Bcl2), mRNA.                                          |
| Vim           | NA     | 0.61  | 4.69  | Mus musculus vimentin (Vim), mRNA.                                                             |
| Vim           | NA     | 0.61  | 3.69  | Mus musculus vimentin (Vim), mRNA.                                                             |
| Vim           | 22352  | 0.61  | 0.36  | vimentin                                                                                       |
| Stk38         | 106504 | 0.61  | 4.71  | serine/threonine kinase 38                                                                     |
| Slc25a24      | 229731 | 0.61  | 2.15  | solute carrier family 25 (mitochondrial carrier, phosphate carrier), member 24                 |
| Rbl2          | NA     | 0.61  | 2.84  | Mus musculus retinoblastoma-like 2 (Rbl2), mRNA.                                               |
| Prkx          | 19108  | 0.61  | 8.2   | protein kinase, X-linked                                                                       |
| Hadhsc        | 15107  | 0.61  | 4     | L-3-hydroxyacyl-Coenzyme A dehydrogenase, short chain                                          |
| Ai414495      | NA     | 0.61  | 3.8   | Mus musculus dickkopf-like 1 (Dkk1), mRNA.                                                     |
| 1110032D12Rik | 56334  | 0.61  | 0.8   | RIKEN cDNA 1110032D12 gene                                                                     |
| Trim10        | 19824  | 0.62  | -2.37 | tripartite motif protein 10                                                                    |
| Spnb2         | NA     | 0.62  | 2.97  | Mus musculus spectrin beta 2 (Spnb2), transcript variant 1, mRNA.                              |
| Rasgrp1       | 19419  | 0.62  | 3.99  | RAS guanyl releasing protein 1                                                                 |
| Pgm2l1        | 70974  | 0.62  | 3.13  | phosphoglucosyltransferase 2-like 1                                                            |
| Pdlim1        | 54132  | 0.62  | 3.13  | PDZ and LIM domain 1 (elfin)                                                                   |
| Eif4a2        | NA     | 0.62  | 3.26  | Mus musculus eukaryotic translation initiation factor 4A2 (Eif4a2), mRNA.                      |
| Dnajc6        | 72685  | 0.62  | 8.59  | DnaJ (Hsp40) homolog, subfamily C, member 6                                                    |
| BC006662      | 223267 | 0.62  | 5.73  | cDNA sequence BC006662                                                                         |
| TRAV14D-2     | NA     | 0.63  | 6.31  | Mus musculus BALB/c T-cell receptor alpha chain (Va2 family) gene, exons 1 and 2, partial cds. |
| Nasp          | NA     | 0.63  | 1.37  | Mus musculus nuclear autoantigenic sperm protein (histone-binding) (Nasp), mRNA.               |
| Lgals9        | NA     | 0.63  | 5.16  | Mus musculus lectin, galactose binding, soluble 9 (Lgals9), mRNA.                              |
| Il22          | 50929  | 0.63  | 9.86  | interleukin 22                                                                                 |
| Cdc25b        | 12531  | 0.63  | 10.26 | cell division cycle 25 homolog B (S. cerevisiae)                                               |
| Btg1          | 12226  | 0.63  | 0.89  | B-cell translocation gene 1, anti-proliferative                                                |
| 6330500D04Rik | 193385 | 0.63  | 3.41  | RIKEN cDNA 6330500D04 gene                                                                     |
| 2610027H17Rik | 71811  | 0.63  | -5.88 | RIKEN cDNA 2610027H17 gene                                                                     |

Table S1B

|               |        |      |       |                                                                                                    |
|---------------|--------|------|-------|----------------------------------------------------------------------------------------------------|
| 201002M12Rik  | 112419 | 0.63 | 2.49  | RIKEN cDNA 201002M12 gene                                                                          |
| Psip1         | NA     | 0.64 | 2.67  | Mus musculus PC4 and SFRS1 interacting protein 1 (Psip1), mRNA.                                    |
| Il9r          | 16199  | 0.64 | 4.64  | interleukin 9 receptor                                                                             |
| Il23r         | 209590 | 0.64 | 12.16 | interleukin 23 receptor                                                                            |
| Capn2         | 12334  | 0.64 | 0.69  | calpain 2                                                                                          |
| Btg1          | 12226  | 0.64 | 0.71  | B-cell translocation gene 1, anti-proliferative                                                    |
| TRAV12D-3     | NA     | 0.65 | 4.42  | Mouse germ line TCR V-alpha F3.3 gene.                                                             |
| Tcrb-V8.2     | 21607  | 0.65 | 5.63  | T-cell receptor beta, variable 8.2                                                                 |
| Arl7          | 320982 | 0.65 | 9.04  | ADP-ribosylation factor-like 7                                                                     |
| 2610204G22Rik | 70448  | 0.65 | 5.08  | RIKEN cDNA 2610204G22 gene                                                                         |
| 2310004K06Rik | NA     | 0.65 | 7.29  | Mus musculus RIKEN cDNA 2310004K06 gene (2310004K06Rik), mRNA.                                     |
| 1110034G24Rik | 73747  | 0.65 | 9.31  | RIKEN cDNA 1110034G24 gene                                                                         |
| TRBV15        | NA     | 0.66 | -0.14 | Mus musculus TCR beta locus from bases 250554 to 501917 (section 2 of 3) of the complete sequence. |
| TRAV7D-3      | NA     | 0.66 | 4.11  | Mouse germline gene for T-cell receptor V-alpha 5H.                                                |
| TRAV12D-2     | NA     | 0.66 | 4.21  | Mouse germline TCR V-alpha F3.2 gene.                                                              |
| Sgk           | 20393  | 0.66 | 4.18  | serum/glucocorticoid regulated kinase                                                              |
| Rasa3         | 19414  | 0.66 | 10    | RAS p21 protein activator 3                                                                        |
| Mips5         | NA     | 0.66 | 7.83  | Mitochondrial 28S ribosomal protein S5 (MRP-S5).                                                   |
| Edg1          | 13609  | 0.66 | 3.13  | endothelial differentiation sphingolipid G-protein-coupled receptor 1                              |
| Dnaja1        | NA     | 0.66 | 1.67  | Mus musculus DnaJ (Hsp40) homolog, subfamily A, member 1 (Dnaja1), mRNA.                           |
| Actr10        | NA     | 0.66 | 4.41  | Mus musculus ARP10 actin-related protein 10 homolog (S. cerevisiae) (Actr10), mRNA.                |
| Slc43a1       | 72401  | 0.67 | 7.62  | solute carrier family 43, member 1                                                                 |
| Rasgrp1       | 19419  | 0.67 | 0.57  | RAS guanyl releasing protein 1                                                                     |
| Lpd           | 94180  | 0.67 | 12.98 | lipidosin                                                                                          |
| 6330500D04Rik | 193385 | 0.67 | 3.06  | RIKEN cDNA 6330500D04 gene                                                                         |
| Tnfrsf19      | 29820  | 0.68 | 0.94  | tumor necrosis factor receptor superfamily, member 19                                              |
| Stat4         | 20849  | 0.68 | 4.76  | signal transducer and activator of transcription 4                                                 |
| Pitpnc1       | 71795  | 0.68 | 4.33  | phosphatidylinositol transfer protein, cytoplasmic 1                                               |
| Itga4         | 16401  | 0.68 | 1.6   | integrin alpha 4                                                                                   |
| Hivep2        | 15273  | 0.68 | 4.21  | human immunodeficiency virus type I enhancer binding protein 2                                     |
| 9330161A08Rik | 320112 | 0.68 | -3.06 | RIKEN cDNA 9330161A08 gene                                                                         |
| 6720435I21Rik | 77734  | 0.68 | 4.04  | RIKEN cDNA 6720435I21 gene                                                                         |
| 2210013M04Rik | 329384 | 0.68 | 8.91  | RIKEN cDNA 2210013M04 gene                                                                         |
| Sh3kbp1       | NA     | 0.69 | 5.64  | Mus musculus SH3-domain kinase binding protein 1 (Sh3kbp1), mRNA.                                  |
| Myo6          | 17920  | 0.69 | 0.93  | myosin VI                                                                                          |
| IGHG1         | NA     | 0.69 | 6.92  | Mouse Ig germline D-J-C region alpha gene and secreted tail.                                       |
| Hlf           | 217082 | 0.69 | -0.1  | hepatic leukemia factor                                                                            |
| Ass1          | NA     | 0.69 | 8.72  | Mus musculus argininosuccinate synthetase 1 (Ass1), mRNA.                                          |
| Apobec2       | 11811  | 0.69 | -1.32 | apolipoprotein B editing complex 2                                                                 |
| Spnb2         | NA     | 0.7  | 4.77  | Mus musculus spectrin beta 2 (Spnb2), transcript variant 1, mRNA.                                  |
| LOC381240     | 381240 | 0.7  | 5.15  | similar to calcium and DAG-regulated guanine nucleotide exchange factor 1                          |
| Lef1          | 16842  | 0.7  | 9.27  | lymphoid enhancer binding factor 1                                                                 |
| Eef2          | NA     | 0.7  | 4.54  | Mus musculus eukaryotic translation elongation factor 2 (Eef2), mRNA.                              |
| Adk           | NA     | 0.7  | 9.21  | Mus musculus adenosine kinase (Adk), mRNA.                                                         |
| Vim           | NA     | 0.71 | 6.09  | Mus musculus vimentin (Vim), mRNA.                                                                 |
| Nckap1        | 50884  | 0.71 | 4.52  | NCK-associated protein 1                                                                           |
| AW320017      | 103030 | 0.71 | 6.73  | expressed sequence AW320017                                                                        |
| TRAV7D-2      | NA     | 0.72 | 5.12  | Mus musculus T-cell receptor alpha locus BAC clone MBAC01 from 14D1-D2, complete sequence.         |
| Scotin        | NA     | 0.72 | 3.19  | Mus musculus scotin gene (Scotin), mRNA.                                                           |
| Rnf125        | 67664  | 0.72 | 10.06 | ring finger protein 125                                                                            |
| Il7r          | 16197  | 0.72 | 11.71 | interleukin 7 receptor                                                                             |
| Hrh4          | 225192 | 0.72 | 8.16  | histamine H4 receptor                                                                              |
| E430024C06Rik | 319443 | 0.72 | -1.76 | RIKEN cDNA E430024C06 gene                                                                         |
| Dnajc6        | 72685  | 0.72 | 6.54  | DnaJ (Hsp40) homolog, subfamily C, member 6                                                        |
| BC022645      | 235633 | 0.72 | 2.01  | cDNA sequence BC022645                                                                             |
| Anapc5        | NA     | 0.72 | 8.91  | Mus musculus anaphase-promoting complex subunit 5 (Anapc5), mRNA.                                  |
| 1500005K14Rik | 76566  | 0.72 | 4.46  | RIKEN cDNA 1500005K14 gene                                                                         |
| Wdr12         | 57750  | 0.73 | 8.71  | WD repeat domain 12                                                                                |
| Rora          | 19883  | 0.73 | 6.13  | RAR-related orphan receptor alpha                                                                  |
| Klf2          | 16598  | 0.73 | 4.34  | Kruppel-like factor 2 (lung)                                                                       |
| 5730469M10Rik | 70564  | 0.73 | 11.66 | RIKEN cDNA 5730469M10 gene                                                                         |
| Grap2         | 17444  | 0.75 | 10.31 | GRB2-related adaptor protein 2                                                                     |
| Igh-4         | 16017  | 0.76 | 6.85  | immunoglobulin heavy chain 4 (serum IgG1)                                                          |
| 6330500D04Rik | 193385 | 0.76 | 5.34  | RIKEN cDNA 6330500D04 gene                                                                         |
| 4933439K08Rik | 71223  | 0.76 | 2.67  | RIKEN cDNA 4933439K08 gene                                                                         |
| TRBV3         | NA     | 0.77 | 4.28  | Mus musculus TCR beta locus from bases 1 to 250611 (section 1 of 3) of the complete sequence.      |
| Socs3         | 12702  | 0.77 | 2.8   | suppressor of cytokine signaling 3                                                                 |
| Eraf          | 170812 | 0.77 | 2.15  | erythroid associated factor                                                                        |
| 9030406N13Rik | 211329 | 0.77 | 4.58  | RIKEN cDNA 9030406N13 gene                                                                         |
| Il18r1        | 16182  | 0.78 | 3.71  | interleukin 18 receptor 1                                                                          |
| Sh3kbp1       | 58194  | 0.79 | 5.52  | SH3-domain kinase binding protein 1                                                                |
| Crip1         | 12925  | 0.79 | 8.37  | cysteine-rich protein 1 (intestinal)                                                               |
| Vim           | NA     | 0.8  | 8.82  | Mus musculus vimentin (Vim), mRNA.                                                                 |
| Vim           | NA     | 0.8  | 8.6   | Mus musculus vimentin (Vim), mRNA.                                                                 |
| TRBV26        | NA     | 0.8  | 3.09  | Mouse T-cell receptor beta-chain germline V-region gene.                                           |
| Sytl3         | 83672  | 0.8  | 7.75  | synaptotagmin-like 3                                                                               |
| Smc4l1        | 70099  | 0.8  | 3.85  | SMC4 structural maintenance of chromosomes 4-like 1 (yeast)                                        |
| Cd96          | 84544  | 0.8  | 6.27  | CD96 antigen                                                                                       |
| Rnf125        | 67664  | 0.81 | 6.4   | ring finger protein 125                                                                            |
| Ltb4r1        | 16995  | 0.81 | 13.05 | leukotriene B4 receptor 1                                                                          |
| Vim           | NA     | 0.82 | 7.08  | Mus musculus vimentin (Vim), mRNA.                                                                 |
| Slc16a5       | 217316 | 0.83 | 8.92  | solute carrier family 16 (monocarboxylic acid transporters), member 5                              |
| Glpr2         | 384009 | 0.83 | 7.81  | GLI pathogenesis-related 2                                                                         |
| Capn2         | 12334  | 0.83 | 7.78  | calpain 2                                                                                          |
| Atp10a        | 11982  | 0.83 | 6.56  | ATPase, class V, type 10A                                                                          |
| Il7r          | 16197  | 0.84 | 7.44  | interleukin 7 receptor                                                                             |
| Eif4g2        | NA     | 0.84 | 0.92  | Mus musculus eukaryotic translation initiation factor 4, gamma 2 (Eif4g2), mRNA.                   |
| A130092J06Rik | 241303 | 0.84 | 5.57  | RIKEN cDNA A130092J06 gene                                                                         |
| 1200015M12Rik | 71739  | 0.85 | 8.2   | RIKEN cDNA 1200015M12 gene                                                                         |
| Prss12        | 19142  | 0.86 | 17.38 | protease, serine, 12 neurotrypsin (motopsin)                                                       |
| Ifit1         | 15957  | 0.87 | -1.98 | interferon-induced protein with tetratricopeptide repeats 1                                        |
| Tcrim         | 77647  | 0.88 | 9.39  | T-cell receptor interacting molecule                                                               |

Table S1B

|               |        |      |       |                                                                                               |
|---------------|--------|------|-------|-----------------------------------------------------------------------------------------------|
| Mal           | 17153  | 0.88 | 6.12  | myelin and lymphocyte protein, T-cell differentiation protein                                 |
| Atp1b3        | 11933  | 0.88 | 13    | ATPase, Na <sup>+</sup> /K <sup>+</sup> transporting, beta 3 polypeptide                      |
| Lef1          | 16842  | 0.89 | 6.54  | lymphoid enhancer binding factor 1                                                            |
| Kih16         | 239743 | 0.9  | 5.3   | kelch-like 6 (Drosophila)                                                                     |
| Il1r1         | 16177  | 0.94 | 6.24  | interleukin 1 receptor, type I                                                                |
| Tcrb-J        | 21580  | 0.95 | 11.85 | T-cell receptor beta, joining region                                                          |
| 2610019F03Rik | 72148  | 0.95 | 17.81 | RIKEN cDNA 2610019F03 gene                                                                    |
| TRBV31        | NA     | 0.96 | 9.47  | Mouse germline T-cell receptor V-beta 14 gene segment 10 kb 3' to C-beta 2 gene.              |
| Trib2         | 217410 | 0.98 | 15.66 | tribbles homolog 2 (Drosophila)                                                               |
| Tcf7          | 21414  | 0.98 | 11.15 | transcription factor 7, T-cell specific                                                       |
| Slc22a4       | 30805  | 0.98 | 6.33  | solute carrier family 22 (organic cation transporter), member 4                               |
| AI661017      | 213068 | 0.98 | 13.84 | expressed sequence AI661017                                                                   |
| 1110060I01Rik | 66207  | 0.98 | 6.78  | RIKEN cDNA 1110060I01 gene                                                                    |
| TRBV6         | NA     | 1.01 | 8.56  | Mus musculus TCR beta locus from bases 1 to 250611 (section 1 of 3) of the complete sequence. |
| Il17re        | 57890  | 1.01 | 19.4  | interleukin 17 receptor E                                                                     |
| 2610304F08Rik | 70468  | 1.02 | 3.54  | RIKEN cDNA 2610304F08 gene                                                                    |
| E430004N04Rik | 210757 | 1.05 | 12.42 | RIKEN cDNA E430004N04 gene                                                                    |
| TRBV1         | NA     | 1.06 | 5.12  | Mus musculus TCR beta locus from bases 1 to 250611 (section 1 of 3) of the complete sequence. |
| Dnajd1        | 66148  | 1.06 | 6.53  | DnaJ (Hsp40) homolog, subfamily D, member 1                                                   |
| 1810045K07Rik | NA     | 1.06 | 12    | Mus musculus RIKEN cDNA 1810045K07 gene (1810045K07Rik), mRNA.                                |
| Actn2         | 11472  | 1.08 | 16.34 | actinin alpha 2                                                                               |
| Ggt1          | 14598  | 1.1  | 3.92  | gamma-glutamyltransferase 1                                                                   |
| Nsg2          | 18197  | 1.11 | 8.84  | neuron specific gene family member 2                                                          |
| 5830431A10Rik | 76024  | 1.13 | 8.73  | RIKEN cDNA 5830431A10 gene                                                                    |
| Pparg         | 19016  | 1.17 | 12.8  | peroxisome proliferator activated receptor gamma                                              |
| C030046M14Rik | NA     | 1.18 | 12.04 | Mus musculus RIKEN cDNA C030046M14 gene (C030046M14Rik), mRNA.                                |
| Morc          | 17450  | 1.2  | 14.59 | microorchidia                                                                                 |
| Cpm           | 70574  | 1.22 | 8.28  | carboxypeptidase M                                                                            |
| Ptgir         | 19222  | 1.28 | 14.74 | prostaglandin I receptor (IP)                                                                 |
| Speer6-ps1    | 73266  | 1.34 | 11.56 | spermatogenesis associated glutamate (E)-rich protein 6, pseudogene 1                         |
| Tcrim         | 77647  | 1.38 | 15.7  | T-cell receptor interacting molecule                                                          |
| Gzma          | 14938  | 1.42 | -1.07 | granzyme A                                                                                    |
| Pdlim4        | 30794  | 1.44 | 15.11 | PDZ and LIM domain 4                                                                          |
| Emp1          | 13730  | 1.68 | 12.36 | epithelial membrane protein 1                                                                 |
| Speer1-ps1    | 70896  | 1.77 | 21.13 | spermatogenesis associated glutamate (E)-rich protein 1, pseudogene 1                         |
