# Supplementary material for: Impact of the TCR Signal on Regulatory T Cell Homeostasis, Function, and Trafficking
Source: PubMed Central journal article supplement (PMC2719063; doi:10.1371/journal.pone.0006580), 2009-08-11
Supplement: pone.0006580.s004.pdf [file pone.0006580.s004.pdf]

# Table S2

## Regulatory

| <i>T cell activation</i>                                                  | GO ID   | Fold Enrichment |
|---------------------------------------------------------------------------|---------|-----------------|
| Lymphocyte activation                                                     | 0046649 | 4.6             |
| Leukocyte activation                                                      | 0045321 | 4.6             |
| Cell activation                                                           | 0001775 | 4.2             |
| <b><i>Apoptosis</i></b>                                                   |         |                 |
| Death                                                                     | 0016265 | 2.2             |
| <b><i>Signaling / Immune Response / Differentiation / Development</i></b> |         |                 |
| Regulation of cell differentiation                                        | 0045595 | 4.6             |
| Hemopoietic or lymphoid organ development                                 | 0048534 | 3.8             |
| Immune system development                                                 | 0002520 | 3.7             |
| Regulation of developmental process                                       | 0050793 | 3.6             |
| Immune response                                                           | 0006955 | 3.2             |

## Memory

| <i>T cell activation</i>                                                  | GO ID   | Fold Enrichment |
|---------------------------------------------------------------------------|---------|-----------------|
| Regulation of lymphocyte activation                                       | 0051249 | 4.6             |
| Regulation of cell activation                                             | 0050865 | 4.7             |
| Lymphocyte activation                                                     | 0046649 | 4.2             |
| T cell activation                                                         | 0042110 | 3.2             |
| Leukocyte activation                                                      | 0045321 | 4.4             |
| <b><i>Proliferation/Cell Cycle</i></b>                                    |         |                 |
| Lymphocyte proliferation                                                  | 0046651 | 4.6             |
| Mononuclear cell proliferation                                            | 0032943 | 4.6             |
| Cell proliferation                                                        | 0008283 | 1.9             |
| <b><i>Apoptosis</i></b>                                                   |         |                 |
| Cell death                                                                | 0008219 | 1.9             |
| Death                                                                     | 0016265 | 1.8             |
| <b><i>Signaling / Immune Response / Differentiation / Development</i></b> |         |                 |
| Immune response-regulating cell surface receptor signaling pathway        | 0002768 | 9.3             |
| Antigen receptor-mediated signaling pathway                               | 0050851 | 7.9             |
| Immune response-activating cell surface receptor signaling pathway        | 0002429 | 8.6             |
| Immune response-regulating signal transduction                            | 0002764 | 8.2             |
| Immune response-activating signal transduction                            | 0002757 | 7.9             |
