# Supplementary material for: Impact of the TCR Signal on Regulatory T Cell Homeostasis, Function, and Trafficking
Source: PubMed Central journal article supplement (PMC2719063; doi:10.1371/journal.pone.0006580), 2009-08-11
Supplement: pone.0006580.s005.pdf [file pone.0006580.s005.pdf]

# Table S2

|                        | GO Term ID                                                                                                                                                                                                                                                          | Fold Enrichment |             |             |            |
|------------------------|---------------------------------------------------------------------------------------------------------------------------------------------------------------------------------------------------------------------------------------------------------------------|-----------------|-------------|-------------|------------|
|                        |                                                                                                                                                                                                                                                                     | q1<br>(250)     | q2<br>(118) | q3<br>(848) | q4<br>(60) |
| <b>Activation</b>      | 0002274 (8), 0051250 (8), 0050864 (9), 0042113 (19), 0051249 (18), 0050865 (18), 0051251 (12), 0050863 (13), 0045321 (36), 0001775 (38), 0046649 (33), 0042110 (19)                                                                                                 |                 |             | 4.2-7.9     |            |
| <b>Proliferation</b>   | 0042100 (8), 0032946 (9), 0032944 (12), 0050670 (12), 0032943 (16), 0046651 (16), 0042098 (10), 0042127 (28), 0008283 (37), 0007049 (40)                                                                                                                            |                 |             | 1.7-8.5     |            |
|                        | 0030261 (2), 0051301 (4), 0022403 (5), 0000278 (4), 0000279 (4), 0022402 (5)                                                                                                                                                                                        |                 |             |             | 3.8-41.3   |
| <b>Apoptosis</b>       | 0008219 (13), 0016265 (13), 0006915 (12), 0012501 (12)                                                                                                                                                                                                              | 2.1-2.2         |             |             |            |
|                        | 0016265 (47), 0042981 (30), 0008219 (47), 0006915 (42), 0012501 (42)                                                                                                                                                                                                |                 |             | 1.9-2.0     |            |
| <b>Signaling</b>       | 0009967 (13), 0051056 (17), 0009966 (39), 0050790 (30), 0007242 (78)                                                                                                                                                                                                |                 |             | 2.0-3.8     |            |
|                        | 0019932 (5), 0006955 (17), 0007242 (23), 0016310 (13), 0048468 (17)                                                                                                                                                                                                 | 1.7-4.3         |             |             |            |
| <b>Immune Response</b> | 0045087 (3), 0001817 (8), 0045619 (7), 0002768 (8), 0001816 (17), 0002443 (15), 0002429 (7), 0002250 (13), 0002460 (13), 0030098 (14), 0002449 (13), 0030099 (14), 0002521 (19), 0050776 (14), 0002252 (16), 0002682 (14), 0006954 (22), 0006955 (47), 0030154 (99) |                 |             | 1.7-13.4    |            |
| <b>Development</b>     | 0030097 (30), 0048534 (32), 0002520 (34), 0048468 (7), 0050793 (21), 0048869 (99), 0048468 (65), 0048731 (79)                                                                                                                                                       |                 |             | 1.4-3.8     |            |
