# Supplementary material for: Impact of the TCR Signal on Regulatory T Cell Homeostasis, Function, and Trafficking
Source: PubMed Central journal article supplement (PMC2719063; doi:10.1371/journal.pone.0006580), 2009-08-11
Supplement: pone.0006580.s006.pdf [file pone.0006580.s006.pdf]

Table S4A

| Symbol        | Gene ID | Description                                                                                          | Treg Lck fold change (log <sub>2</sub> ) | Treg/Tconv signature (log <sub>2</sub> ) |
|---------------|---------|------------------------------------------------------------------------------------------------------|------------------------------------------|------------------------------------------|
| Ii2ra         | 16184   | interleukin 2 receptor, alpha chain                                                                  | -0.14                                    | 5.558                                    |
| Foxp3         | 20371   | forkhead box P3                                                                                      | -0.18                                    | 5.178                                    |
| Plagl1        | 22634   | pleiomorphic adenoma gene-like 1                                                                     | -0.32                                    | 4.300                                    |
| Itgb8         | 320910  | integrin beta 8                                                                                      | -0.09                                    | 4.285                                    |
| Socs2         | 216233  | suppressor of cytokine signaling 2                                                                   | -0.09                                    | 4.263                                    |
| Dusp4         | 319520  | dual specificity phosphatase 4                                                                       | -1.3                                     | 3.621                                    |
| 4631408O11Rik | 66693   | RIKEN cDNA 4631408O11 gene                                                                           | -0.79                                    | 3.392                                    |
| Ii2rb         | 16185   | Interleukin 2 receptor, beta chain                                                                   | -0.35                                    | 3.336                                    |
| Ctla4         | 12477   | cytotoxic T-lymphocyte-associated protein 4                                                          | -0.62                                    | 3.202                                    |
| Gpr83         | 14608   | G protein-coupled receptor 83                                                                        | -0.39                                    | 3.104                                    |
| Zfpn1a4       | 22781   | zinc finger protein, subfamily 1A, 4 (Eos)                                                           | -0.09                                    | 3.104                                    |
| Itih5         | 209378  | inter-alpha (globulin) inhibitor H5                                                                  | -0.44                                    | 3.018                                    |
| A730095J18Rik | 319462  | RIKEN cDNA A730095J18 gene                                                                           | 0.04                                     | 2.963                                    |
| Zfpn1a2       | 22779   | zinc finger protein, subfamily 1A, 2 (Helios)                                                        | -0.79                                    | 2.848                                    |
| Rgs16         | 19734   | regulator of G-protein signaling 16                                                                  | -0.32                                    | 2.828                                    |
| Nrp1          | 18186   | neuropilin 1                                                                                         | -0.83                                    | 2.807                                    |
| Tiam1         | 21844   | T-cell lymphoma invasion and metastasis 1                                                            | -1.1                                     | 2.766                                    |
| Hmgn3         | 94353   | high mobility group nucleosomal binding domain 3                                                     | -1.05                                    | 2.678                                    |
| Itgae         | 16407   | integrin, alpha E, epithelial-associated                                                             | -0.9                                     | 2.609                                    |
| Prnp          | 19122   | prion protein                                                                                        | 0.03                                     | 2.536                                    |
| Ptger2        | 19217   | prostaglandin E receptor 2 (subtype EP2)                                                             | -1.06                                    | 2.511                                    |
| Rgs1          | 50778   | regulator of G-protein signaling 1                                                                   | -0.11                                    | 2.459                                    |
| Myo9a         | 272606  | Myosin IXa                                                                                           | 0.04                                     | 2.459                                    |
| Sh3bgrl2      | 212531  | SH3 domain binding glutamic acid-rich protein like 2                                                 | 0.99                                     | 2.459                                    |
| 8430427H17Rik | 329540  | RIKEN cDNA 8430427H17 gene                                                                           | -0.35                                    | 2.433                                    |
| Prg4          | 96875   | proteoglycan 4 (megakaryocyte stimulating factor, articular superficial zone protein)                | -0.21                                    | 2.433                                    |
| Melk          | 17279   | maternal embryonic leucine zipper kinase                                                             | -0.08                                    | 2.433                                    |
| Tnfrsf4       | 22163   | tumor necrosis factor receptor superfamily, member 4                                                 | -1.47                                    | 2.406                                    |
| Mbnl3         | 171170  | muscleblind-like 3 (Drosophila)                                                                      | -0.68                                    | 2.406                                    |
| Slc22a2       | 20518   | solute carrier family 22 (organic cation transporter), member 2                                      | -0.46                                    | 2.379                                    |
| Map3k8        | 26410   | mitogen activated protein kinase kinase kinase 8                                                     | -0.12                                    | 2.379                                    |
| 1110032F04Rik | 68725   | RIKEN cDNA 1110032F04 gene                                                                           | -0.83                                    | 2.350                                    |
| Arhgap20      | 244867  | Rho GTPase activating protein 20                                                                     | -0.7                                     | 2.350                                    |
| Rragd         | 52187   | Ras-related GTP binding D                                                                            | -0.16                                    | 2.322                                    |
| Dst           | 13518   | dystonin                                                                                             | -0.44                                    | 2.263                                    |
| Usp27x        | 54651   | ubiquitin specific peptidase 27, X chromosome                                                        | 0.03                                     | 2.263                                    |
| Serpina3g     | 20715   | serine (or cysteine) peptidase inhibitor, clade A, member 3G                                         | -0.86                                    | 2.233                                    |
| Cpe           | 12876   | carboxypeptidase E                                                                                   | 0.24                                     | 2.202                                    |
| 6430570G24    | 327989  | Hypothetical protein 6430570G24                                                                      | -0.54                                    | 2.170                                    |
| Folr4         | 64931   | folate receptor 4 (delta)                                                                            | -0.22                                    | 2.170                                    |
| Gata1         | 14460   | GATA binding protein 1                                                                               | 0.14                                     | 2.170                                    |
| 5830456J23Rik | 76105   | RIKEN cDNA 5830456J23 gene                                                                           | -0.59                                    | 2.104                                    |
| Klrg1         | 50928   | killer cell lectin-like receptor subfamily G, member 1                                               | -0.19                                    | 2.070                                    |
| Pmaip1        | 58801   | phorbol-12-myristate-13-acetate-induced protein 1                                                    | -0.44                                    | 2.036                                    |
| Ptpn13        | 19249   | protein tyrosine phosphatase, non-receptor type 13                                                   | -0.07                                    | 2.036                                    |
| Gbp4          | 55932   | guanylate nucleotide binding protein 4                                                               | 0.26                                     | 2.036                                    |
| Rabgap11      | 29809   | RAB GTPase activating protein 11-like                                                                | -0.69                                    | 2.000                                    |
| Spry1         | 24063   | sprouty homolog 1 (Drosophila)                                                                       | -0.59                                    | 2.000                                    |
| Gnaq          | 14682   | guanine nucleotide binding protein, alpha q polypeptide                                              | -0.2                                     | 2.000                                    |
| H2-Ob         | 15002   | histocompatibility 2, O region beta locus                                                            | -0.12                                    | 2.000                                    |
| 4921524J06Rik | 77057   | RIKEN cDNA 4921524J06 gene                                                                           | 0                                        | 2.000                                    |
| Vav2          | 22325   | Vav2 oncogene                                                                                        | -0.57                                    | 1.963                                    |
| Cd200         | 17470   | Cd200 antigen                                                                                        | -0.98                                    | 1.926                                    |
| Trim59        | 66949   | Tripartite motif-containing 59                                                                       | -0.39                                    | 1.926                                    |
| Frm4b         | 232288  | FERM domain containing 4B                                                                            | -0.06                                    | 1.926                                    |
| Niban         | 63913   | niban protein                                                                                        | -0.52                                    | 1.888                                    |
| Cd86          | 12524   | CD86 antigen                                                                                         | -0.3                                     | 1.888                                    |
| Cd83          | 12522   | CD83 antigen                                                                                         | -1.81                                    | 1.848                                    |
| Eno3          | 13808   | enolase 3, beta muscle                                                                               | -0.89                                    | 1.807                                    |
| Bhlhb2        | 20893   | basic helix-loop-helix domain containing, class B2                                                   | -0.76                                    | 1.807                                    |
| Nt5e          | 23959   | 5' nucleotidase, ecto                                                                                | -0.87                                    | 1.766                                    |
| Ndg2          | 103172  | Nur77 downstream gene 2                                                                              | -0.82                                    | 1.766                                    |
| Plcl1         | 227120  | Phospholipase C-like 1                                                                               | -0.31                                    | 1.766                                    |
| Slc35d1       | 242585  | Solute carrier family 35 (UDP-glucuronic acid/UDP-N-acetylgalactosamine dual transporter), member D1 | -0.29                                    | 1.766                                    |
| Gpr34         | 23890   | G protein-coupled receptor 34                                                                        | 0.53                                     | 1.766                                    |
| Rcn1          | 19672   | reticulocalbin 1                                                                                     | 0.67                                     | 1.766                                    |
| Hivep3        | 16656   | human immunodeficiency virus type I enhancer binding protein 3                                       | -0.77                                    | 1.722                                    |
| Kif13a        | 16553   | kinesin family member 13A                                                                            | -0.48                                    | 1.722                                    |
| Gfi1          | 14581   | growth factor independent 1                                                                          | -0.46                                    | 1.722                                    |
| Adamts6       | 108154  | a disintegrin-like and metalloproteinase (reprolysin type) with thrombospondin type 1 motif, 6       | -0.4                                     | 1.722                                    |
| Il1r1         | 17082   | interleukin 1 receptor-like 1                                                                        | 0.07                                     | 1.722                                    |
| Swap70        | 20947   | SWA-70 protein                                                                                       | -0.89                                    | 1.678                                    |
| Capn3         | 12335   | calpain 3                                                                                            | -0.59                                    | 1.678                                    |
| Maf           | 17132   | avian musculoaponeurotic fibrosarcoma (v-maf) AS42 oncogene homolog                                  | -0.43                                    | 1.678                                    |
| Lrig1         | 16206   | leucine-rich repeats and immunoglobulin-like domains 1                                               | -0.35                                    | 1.678                                    |
| Gbp1          | 14468   | guanylate nucleotide binding protein 1                                                               | -0.06                                    | 1.678                                    |
| Plscr1        | 22038   | phospholipid scramblase 1                                                                            | -0.4                                     | 1.632                                    |
| Adam19        | 11492   | a disintegrin and metalloproteinase domain 19 (meltrin beta)                                         | 0.01                                     | 1.632                                    |
| Phtf2         | 68770   | Putative homeodomain transcription factor 2                                                          | -0.59                                    | 1.585                                    |
| 2510009E07Rik | 72190   | RIKEN cDNA 2510009E07 gene                                                                           | -0.3                                     | 1.585                                    |
| Cttn          | 13043   | cortactin                                                                                            | 0.15                                     | 1.585                                    |
| Stx11         | 74732   | syntaxin 11                                                                                          | -0.83                                    | 1.536                                    |
| Cd81          | 12520   | CD 81 antigen                                                                                        | -0.73                                    | 1.536                                    |

Table S4A

|               |        |                                                                      |       |       |
|---------------|--------|----------------------------------------------------------------------|-------|-------|
| Igf1r         | 16001  | Insulin-like growth factor I receptor                                | -0.25 | 1.536 |
| Coro2a        | 107684 | coronin, actin binding protein 2A                                    | -0.19 | 1.536 |
| Ecm1          | 13601  | extracellular matrix protein 1                                       | -0.13 | 1.536 |
| Cish          | 12700  | cytokine inducible SH2-containing protein                            | -0.07 | 1.536 |
| Pip5k1a       | 18719  | phosphatidylinositol-4-phosphate 5-kinase, type 1 alpha              | 0.02  | 1.536 |
| Gsto1         | 14873  | glutathione S-transferase omega 1                                    | -1.22 | 1.485 |
| Ccr6          | 12458  | chemokine (C-C motif) receptor 6                                     | -0.78 | 1.485 |
| 1200007D18Rik | 67458  | RIKEN cDNA 1200007D18 gene                                           | -0.49 | 1.485 |
| Ahr           | 11622  | aryl-hydrocarbon receptor                                            | -0.38 | 1.485 |
| Slc2a3        | 20527  | solute carrier family 2 (facilitated glucose transporter), member 3  | -0.12 | 1.485 |
| Cd38          | 12494  | CD38 antigen                                                         | -0.1  | 1.485 |
| Tktl1         | 83553  | transketolase-like 1                                                 | -0.06 | 1.485 |
| Sh3gl3        | 20408  | SH3-domain GRB2-like 3                                               | -0.9  | 1.433 |
| Cyfp1         | 20430  | cytoplasmic FMR1 interacting protein 1                               | -0.88 | 1.433 |
| Cerk          | 223753 | ceramide kinase                                                      | -0.39 | 1.433 |
| Serpinb6b     | 20708  | serine (or cysteine) peptidase inhibitor, clade B, member 6b         | -0.16 | 1.433 |
| Traf1         | 22029  | Tnf receptor-associated factor 1                                     | 0.03  | 1.433 |
| Camk2b        | 12323  | Calcium/calmodulin-dependent protein kinase II, beta                 | 0.04  | 1.433 |
| Hipk2         | 15258  | Homeodomain interacting protein kinase 2                             | 0.05  | 1.433 |
| Tnfrsf9       | 21942  | tumor necrosis factor receptor superfamily, member 9                 | -1.21 | 1.379 |
| Tnfrsf1b      | 21938  | tumor necrosis factor receptor superfamily, member 1b                | -0.66 | 1.379 |
| Anxa4         | 11746  | annexin A4                                                           | -0.48 | 1.379 |
| Phlda1        | 21664  | pleckstrin homology-like domain, family A, member 1                  | -0.35 | 1.379 |
| E030024N20Rik | 319427 | RIKEN cDNA E030024N20 gene                                           | -0.09 | 1.379 |
| Slc22a5       | 20520  | solute carrier family 22 (organic cation transporter), member 5      | 0.04  | 1.379 |
| C80638        | 97086  | expressed sequence C80638                                            | -1.36 | 1.322 |
| Gabarapl1     | 57436  | gamma-aminobutyric acid (GABA(A)) receptor-associated protein-like 1 | -0.24 | 1.322 |
| Xdh           | 22436  | xanthine dehydrogenase                                               | -0.1  | 1.322 |
| Ppm1l         | 242083 | protein phosphatase 1 (formerly 2C)-like                             | -0.08 | 1.322 |
| Tnfrsf11      | 21943  | tumor necrosis factor (ligand) superfamily, member 11                | -1.19 | 1.263 |
| Penk1         | 18619  | preproenkephalin 1                                                   | -0.9  | 1.263 |
| Zfp52         | 22710  | zinc finger protein 52                                               | -0.67 | 1.263 |
| Eno2          | 13807  | enolase 2, gamma neuronal                                            | -0.56 | 1.263 |
| Igf2r         | 16004  | insulin-like growth factor 2 receptor                                | -0.45 | 1.263 |
| Eea1          | 216238 | early endosome antigen 1                                             | -0.43 | 1.263 |
| Rhoq          | 104215 | ras homolog gene family, member Q                                    | -0.42 | 1.263 |
| Ggta1         | 14594  | glycoprotein galactosyltransferase alpha 1, 3                        | -0.39 | 1.263 |
| Arhgef12      | 69632  | Rho guanine nucleotide exchange factor (GEF) 12                      | -0.28 | 1.263 |
| 1810054D07Rik | 69863  | RIKEN cDNA 1810054D07 gene                                           | -0.2  | 1.263 |
| C230081A13Rik | 244895 | RIKEN cDNA C230081A13 gene                                           | 0.04  | 1.263 |
| Ga17          | 98221  | Dendritic cell protein GA17                                          | 0.11  | 1.263 |
| 6330509M05Rik | 102913 | RIKEN cDNA 6330509M05 gene                                           | -0.51 | 1.202 |
| Scamp1        | 107767 | secretory carrier membrane protein 1                                 | -0.37 | 1.202 |
| Eef2k         | 13631  | eukaryotic elongation factor-2 kinase                                | -0.34 | 1.202 |
| Zfp467        | 68910  | zinc finger protein 467                                              | -0.27 | 1.202 |
| Ddc           | 13195  | dopa decarboxylase                                                   | -0.26 | 1.202 |
| 2510042P03Rik | 72421  | RIKEN cDNA 2510042P03 gene                                           | -0.11 | 1.202 |
| Neb           | 17996  | nebulin                                                              | 0.04  | 1.202 |
| 4631427C17Rik | 74340  | RIKEN cDNA 4631427C17 gene                                           | 0.11  | 1.202 |
| Nrn1          | 68404  | neuritin 1                                                           | -1.4  | 1.138 |
| Samsn1        | 67742  | SAM domain, SH3 domain and nuclear localization signals, 1           | -1.1  | 1.138 |
| Trpm1         | 17364  | transient receptor potential cation channel, subfamily M, member 1   | -0.69 | 1.138 |
| Ndrp1         | 17988  | N-myc downstream regulated gene 1                                    | -0.61 | 1.138 |
| Csda          | 56449  | cold shock domain protein A                                          | -0.4  | 1.138 |
| Myo1e         | 71602  | myosin IE                                                            | -0.38 | 1.138 |
| Entpd1        | 12495  | ectonucleoside triphosphate diphosphohydrolase 1                     | -0.36 | 1.138 |
| Rnase4        | 58809  | ribonuclease, RNase A family 4                                       | -0.22 | 1.138 |
| C030046G05    | 327885 | hypothetical protein C030046G05                                      | -1.03 | 1.070 |
| Inpp5f        | 101490 | inositol polyphosphate-5-phosphatase F                               | -0.78 | 1.070 |
| Osbp13        | 71720  | oxysterol binding protein-like 3                                     | -0.66 | 1.070 |
| A530052I06Rik | 99953  | RIKEN cDNA A530052I06 gene                                           | -0.62 | 1.070 |
| Kcnk6         | 52150  | potassium inwardly-rectifying channel, subfamily K, member 6         | -0.45 | 1.070 |
| Gphn          | 268566 | gephyrin                                                             | -0.44 | 1.070 |
| Ndr1          | 17990  | N-myc downstream regulated-like                                      | -0.31 | 1.070 |
| 4930566A11Rik | 75871  | RIKEN cDNA 4930566A11 gene                                           | -0.28 | 1.070 |
| Galm          | 319625 | galactose mutarotase                                                 | -0.21 | 1.070 |
| Slamf1        | 27218  | signaling lymphocytic activation molecule family member 1            | -0.18 | 1.070 |
| Ccr12         | 54199  | chemokine (C-C motif) receptor-like 2                                | -0.13 | 1.070 |
| Gadd45g       | 23882  | growth arrest and DNA-damage-inducible 45 gamma                      | -0.08 | 1.070 |
| Rab6ip1       | 19347  | Rab6 interacting protein 1                                           | 0.01  | 1.070 |
| 4833442J19Rik | 320204 | RIKEN cDNA 4833442J19 gene                                           | 0.2   | 1.070 |
| Slc14a1       | 108052 | solute carrier family 14 (urea transporter), member 1                | 0.21  | 1.070 |
| 1300007C21Rik | 67527  | RIKEN cDNA 1300007C21 gene                                           | -1.32 | 1.000 |
| Ptprs         | 19280  | protein tyrosine phosphatase, receptor type, S                       | -0.95 | 1.000 |
| Alcam         | 11658  | activated leukocyte cell adhesion molecule                           | -0.92 | 1.000 |
| Nr4a2         | 18227  | Nuclear receptor subfamily 4, group A, member 2                      | -0.69 | 1.000 |
| Syt11         | 229521 | synaptotagmin XI                                                     | -0.51 | 1.000 |
| Snag1         | 170625 | sorting nexin associated golgi protein 1                             | -0.31 | 1.000 |
| 2510005D08Rik | 68043  | RIKEN cDNA 2510005D08 gene                                           | -0.22 | 1.000 |
| Matn2         | 17181  | matrilin 2                                                           | -0.18 | 1.000 |
| AI875142      | 103885 | expressed sequence AI875142                                          | -0.17 | 1.000 |
| Vps54         | 245944 | vacuolar protein sorting 54 (yeast)                                  | -0.16 | 1.000 |
| Cdk6          | 12571  | cyclin-dependent kinase 6                                            | -0.1  | 1.000 |
| Smyd2         | 226830 | SET and MYND domain containing 2                                     | -0.02 | 1.000 |
| Samhd1        | 56045  | SAM domain and HD domain, 1                                          | 0.29  | 1.000 |

Table S4A

|               |        |                                                                                                |       |        |
|---------------|--------|------------------------------------------------------------------------------------------------|-------|--------|
| Tgm2          | 21817  | transglutaminase 2, C polypeptide                                                              | 0.47  | 1.000  |
| Sh3bgrl       | 56726  | SH3-binding domain glutamic acid-rich protein like                                             | -0.63 | 0.926  |
| Tgfb1         | 21812  | transforming growth factor, beta receptor I                                                    | -0.57 | 0.926  |
| Myo1c         | 17913  | myosin IC                                                                                      | -0.5  | 0.926  |
| Socs5         | 56468  | suppressor of cytokine signaling 5                                                             | -0.46 | 0.926  |
| Evi5          | 14020  | ecotropic viral integration site 5                                                             | -0.44 | 0.926  |
| Gem           | 14579  | GTP binding protein (gene overexpressed in skeletal muscle)                                    | -0.31 | 0.926  |
| D630039A03Rik | 242484 | RIKEN cDNA D630039A03 gene                                                                     | -0.27 | 0.926  |
| Zfpn1a3       | 22780  | zinc finger protein, subfamily 1A, 3 (Aiolos)                                                  | -0.22 | 0.926  |
| Bmpr2         | 12168  | bone morphogenic protein receptor, type II (serine/threonine kinase)                           | -0.19 | 0.926  |
| Plcb4         | 18798  | phospholipase C, beta 4                                                                        | -0.03 | 0.926  |
| Lta           | 16992  | lymphotoxin A                                                                                  | 0.06  | 0.926  |
| 2810402A17Rik | 67062  | RIKEN cDNA 2810402A17 gene                                                                     | 0.12  | 0.926  |
| Egr2          | 13654  | early growth response 2                                                                        | -1.45 | 0.848  |
| Ephx1         | 13849  | epoxide hydrolase 1, microsomal                                                                | -0.96 | 0.848  |
| Tank          | 21353  | TRAF family member-associated Nf-kappa B activator                                             | -0.7  | 0.848  |
| Plp2          | 18824  | proteolipid protein 2                                                                          | -0.49 | 0.848  |
| Tnfrsf18      | 21936  | tumor necrosis factor receptor superfamily, member 18                                          | -0.42 | 0.848  |
| Capg          | 12332  | capping protein (actin filament), gelsolin-like                                                | -0.37 | 0.848  |
| Slc12a2       | 20496  | solute carrier family 12, member 2                                                             | -0.32 | 0.848  |
| D18Ert653e    | 52662  | DNA segment, Chr 18, ERATO Doi 653, expressed                                                  | -0.24 | 0.848  |
| Prkca         | 18750  | Protein kinase C, alpha                                                                        | -0.18 | 0.848  |
| E2f3          | 13557  | E2F transcription factor 3                                                                     | -0.16 | 0.848  |
| Laptm4b       | 114128 | lysosomal-associated protein transmembrane 4B                                                  | -0.12 | 0.848  |
| Fabp5         | 16592  | fatty acid binding protein 5, epidermal                                                        | -0.11 | 0.848  |
| Nipa2         | 93790  | non imprinted in Prader-Willi/Angelman syndrome 2 homolog (human)                              | -0.11 | 0.848  |
| Mgat5         | 107895 | mannoside acetylglucosaminyltransferase 5                                                      | -0.11 | 0.848  |
| Casp7         | 12369  | caspase 7                                                                                      | -0.1  | 0.848  |
| Sla           | 20491  | Src-like adaptor                                                                               | -0.06 | 0.848  |
| Bid           | 12122  | BH3 interacting domain death agonist                                                           | -0.06 | 0.848  |
| Abcb1a        | 18671  | ATP-binding cassette, sub-family B (MDR/TAP), member 1A                                        | -0.01 | 0.848  |
| Lpxn          | 107321 | leupaxin                                                                                       | 0.02  | 0.848  |
| Slc4a7        | 218756 | solute carrier family 4, sodium bicarbonate cotransporter, member 7                            | 0.03  | 0.848  |
| 2010111101Rik | 72061  | RIKEN cDNA 2010111101 gene                                                                     | 0.04  | 0.848  |
| BC053440      | 234344 | cDNA sequence BC053440                                                                         | 0.06  | 0.848  |
| Pros1         | 19128  | protein S (alpha)                                                                              | 0.07  | 0.848  |
| Sec24a        | 77371  | SEC24 related gene family, member A (S. cerevisiae)                                            | 0.39  | 0.848  |
| Pdcd1lg2      | 58205  | programmed cell death 1 ligand 2                                                               | -0.54 | 0.766  |
| Lxn           | 17035  | latexin                                                                                        | -0.5  | 0.766  |
| Ptger4        | 19219  | prostaglandin E receptor 4 (subtype EP4)                                                       | -0.48 | 0.766  |
| Ebi3          | 50498  | Epstein-Barr virus induced gene 3                                                              | -0.45 | 0.766  |
| A530088107Rik | 212167 | RIKEN cDNA A530088107 gene                                                                     | -0.43 | 0.766  |
| 5830474E16Rik | 76094  | RIKEN cDNA 5830474E16 gene                                                                     | -0.36 | 0.766  |
| D10Ucla1      | 28193  | DNA segment, Chr 10, University of California at Los Angeles 1                                 | -0.28 | 0.766  |
| Nfil3         | 18030  | nuclear factor, interleukin 3, regulated                                                       | -0.24 | 0.766  |
| Gprasp2       | 245607 | G protein-coupled receptor associated sorting protein 2                                        | -0.23 | 0.766  |
| Icam1         | 15894  | intercellular adhesion molecule                                                                | -0.2  | 0.766  |
| Tnfrsf25      | 85030  | tumor necrosis factor receptor superfamily, member 25                                          | -0.2  | 0.766  |
| Atp6v0a1      | 11975  | ATPase, H+ transporting, lysosomal V0 subunit A1                                               | -0.19 | 0.766  |
| Rora          | 19883  | RAR-related orphan receptor alpha                                                              | -0.18 | 0.766  |
| 2810051F02Rik | 72704  | RIKEN cDNA 2810051F02 gene                                                                     | -0.12 | 0.766  |
| Bcl2l1        | 12048  | Bcl2-like 1                                                                                    | -0.11 | 0.766  |
| Ibrdc3        | 75234  | IBR domain containing 3                                                                        | -0.06 | 0.766  |
| AI480653      | 268880 | expressed sequence AI480653                                                                    | -0.06 | 0.766  |
| Pscd3         | 19159  | pleckstrin homology, Sec7 and coiled-coil domains 3                                            | 0.08  | 0.766  |
| P2ry10        | 78826  | purinergic receptor P2Y, G-protein coupled 10                                                  | 0.29  | 0.766  |
| Gzmb          | 14939  | granzyme B                                                                                     | 0.41  | 0.766  |
| Cst7          | 13011  | cystatin F (leukocystatin)                                                                     | -0.78 | 0.678  |
| 4732460K03Rik | 58894  | RIKEN cDNA 4732460K03 gene                                                                     | -0.77 | 0.678  |
| Birc1e        | 17951  | baculoviral IAP repeat-containing 1e                                                           | -0.43 | 0.678  |
| 6330403K07Rik | 103712 | RIKEN cDNA 6330403K07 gene                                                                     | -0.41 | 0.678  |
| Sdc4          | 20971  | syndecan 4                                                                                     | -0.41 | 0.678  |
| Crsp9         | 66213  | cofactor required for Sp1 transcriptional activation, subunit 9                                | -0.38 | 0.678  |
| Atpif1        | 11983  | ATPase inhibitory factor 1                                                                     | -0.36 | 0.678  |
| 2610027H17Rik | 71811  | RIKEN cDNA 2610027H17 gene                                                                     | -0.35 | 0.678  |
| Sypl          | 19027  | synaptophysin-like protein                                                                     | -0.23 | 0.678  |
| Homer1        | 26556  | homer homolog 1 (Drosophila)                                                                   | -0.21 | 0.678  |
| Unc119        | 22248  | unc-119 homolog (C. elegans)                                                                   | -0.18 | 0.678  |
| Arrdc4        | 66412  | arrestin domain containing 4                                                                   | -0.15 | 0.678  |
| Pafah1b3      | 18476  | platelet-activating factor acetylhydrolase, isoform 1b, alpha1 subunit                         | -0.15 | 0.678  |
| 3110045G13Rik | 73182  | RIKEN cDNA 3110045G13 gene                                                                     | -0.07 | 0.678  |
| Ahnak         | 11621  | AHNAK nucleoprotein (desmoyokin)                                                               | 0.01  | 0.678  |
| Crsp2         | 13008  | cysteine and glycine-rich protein 2                                                            | 0.09  | 0.678  |
| Car12         | 76459  | carbonic anhydrase 12                                                                          | 0.09  | 0.678  |
| Tlr7          | 170743 | toll-like receptor 7                                                                           | 0.15  | 0.678  |
| P4ha1         | 18451  | procollagen-proline, 2-oxoglutarate 4-dioxygenase (proline 4-hydroxylase), alpha 1 polypeptide | 0.21  | 0.678  |
| 2810474O19Rik | 67246  | RIKEN cDNA 2810474O19 gene                                                                     | 0.36  | 0.678  |
| Irf4          | 16364  | interferon regulatory factor 4                                                                 | -1.02 | 0.585  |
| Twsg1         | 65960  | twisted gastrulation homolog 1 (Drosophila)                                                    | -0.86 | 0.585  |
| E130308A19Rik | 230259 | RIKEN cDNA E130308A19 gene                                                                     | -0.71 | 0.585  |
| 1700108L22Rik | 214048 | RIKEN cDNA 1700108L22 gene                                                                     | -0.44 | 0.585  |
| Mapk12        | 29857  | mitogen-activated protein kinase 12                                                            | -0.38 | 0.585  |
| Dapp1         | 26377  | dual adaptor for phosphotyrosine and 3-phosphoinositides 1                                     | -0.17 | 0.585  |
| Hdgfrp3       | 29877  | hepatoma-derived growth factor, related protein 3                                              | -0.01 | 0.585  |
| Hist2h2be     | 319190 | histone 2, H2be                                                                                | -0.25 | -0.515 |

Table S4A

|               |        |                                                                                                      |       |        |
|---------------|--------|------------------------------------------------------------------------------------------------------|-------|--------|
| Bcl9          | 77578  | B-cell CLL/lymphoma 9                                                                                | -0.11 | -0.515 |
| Sestd1        | 228071 | SEC14 and spectrin domains 1                                                                         | -0.07 | -0.515 |
| 1300007F04Rik | 67477  | RIKEN cDNA 1300007F04 gene                                                                           | 0.01  | -0.515 |
| Entpd5        | 12499  | ectonucleoside triphosphate diphosphohydrolase 5                                                     | 0.39  | -0.515 |
| Klhdc2        | 69554  | kelch domain containing 2                                                                            | -0.55 | -0.737 |
| Igsf6         | 80719  | immunoglobulin superfamily, member 6                                                                 | -0.44 | -0.737 |
| Pde7a         | NA     | phosphodiesterase 7A                                                                                 | -0.12 | -0.737 |
| Pim2          | 18715  | proviral integration site 2                                                                          | -0.06 | -0.737 |
| Bach2         | 12014  | BTB and CNC homology 2                                                                               | 0.01  | -0.737 |
| Elovl7        | 74559  | ELOVL family member 7, elongation of long chain fatty acids (yeast)                                  | 0.07  | -0.737 |
| Ranbp10       | 74334  | RAN binding protein 10                                                                               | 0.09  | -0.737 |
| Tle4          | 21888  | transducin-like enhancer of split 4, homolog of Drosophila E(spl)                                    | 0.1   | -0.737 |
| Gsn           | 227753 | gelsolin                                                                                             | 0.12  | -0.737 |
| Spnb2         | 20742  | spectrin beta 2                                                                                      | 0.12  | -0.737 |
| Nlk           | 18099  | nemo like kinase                                                                                     | 0.13  | -0.737 |
| B930041F14Rik | 230991 | RIKEN cDNA B930041F14 gene                                                                           | 0.2   | -0.737 |
| Add3          | 27360  | adducin 3 (gamma)                                                                                    | 0.21  | -0.737 |
| Rassf3        | 192678 | Ras association (RalGDS/AF-6) domain family 3                                                        | 0.22  | -0.737 |
| Itk           | 16428  | IL2-inducible T-cell kinase                                                                          | 0.24  | -0.737 |
| Gpd2          | 14571  | glycerol phosphate dehydrogenase 2, mitochondrial                                                    | 0.35  | -0.737 |
| C230085N15Rik | 320556 | RIKEN cDNA C230085N15 gene                                                                           | 0.35  | -0.737 |
| Tmie          | 20776  | transmembrane inner ear                                                                              | 0.38  | -0.737 |
| Rsn           | 56430  | restin (Reed-Steinberg cell-expressed intermediate filament-associated protein)                      | 0.39  | -0.737 |
| Lef1          | 16842  | lymphoid enhancer binding factor 1                                                                   | 0.47  | -0.737 |
| C230093N12Rik | 98952  | RIKEN cDNA C230093N12 gene                                                                           | 0.53  | -0.737 |
| C030002B11Rik | 78540  | RIKEN cDNA C030002B11 gene                                                                           | 0.61  | -0.737 |
| Pdk1          | 228026 | pyruvate dehydrogenase kinase, isoenzyme 1                                                           | 0.67  | -0.737 |
| Dntt          | 21673  | deoxynucleotidyltransferase, terminal                                                                | 0.83  | -0.737 |
| 5830431A10Rik | 76024  | RIKEN cDNA 5830431A10 gene                                                                           | 0.88  | -0.737 |
| 1500005K14Rik | 76566  | RIKEN cDNA 1500005K14 gene                                                                           | 1.14  | -0.737 |
| 4930431H11Rik | 73785  | RIKEN cDNA 4930431H11 gene                                                                           | -0.43 | -1.000 |
| Ebi2          | 321019 | Epstein-Barr virus induced gene 2                                                                    | -0.39 | -1.000 |
| Gpr171        | 229323 | G protein-coupled receptor 171                                                                       | -0.32 | -1.000 |
| A430107P09Rik | 320898 | RIKEN cDNA A430107P09 gene                                                                           | -0.14 | -1.000 |
| 2210010L05Rik | 98682  | RIKEN cDNA 2210010L05 gene                                                                           | -0.02 | -1.000 |
| Evi2b         | 216984 | ecotropic viral integration site 2b                                                                  | 0.05  | -1.000 |
| AB124611      | 382062 | cDNA sequence AB124611                                                                               | 0.05  | -1.000 |
| Ggta1         | 23887  | gamma-glutamyltransferase-like activity 1                                                            | 0.06  | -1.000 |
| Tgfb2         | 21813  | transforming growth factor, beta receptor II                                                         | 0.1   | -1.000 |
| Ust           | 338362 | Uronyl-2-sulfotransferase                                                                            | 0.12  | -1.000 |
| Daam1         | 208846 | dishevelled associated activator of morphogenesis 1                                                  | 0.21  | -1.000 |
| Gmfg          | 63986  | glia maturation factor, gamma                                                                        | 0.21  | -1.000 |
| Lyst          | 17101  | lysosomal trafficking regulator                                                                      | 0.22  | -1.000 |
| Sema4a        | 20351  | sema domain, Ig domain (Ig), transmembrane domain (TM) and short cytoplasmic domain, (semaphorin) 4A | 0.22  | -1.000 |
| 1110038D17Rik | 68778  | RIKEN cDNA 1110038D17 gene                                                                           | 0.22  | -1.000 |
| Slc20a1       | 20515  | solute carrier family 20, member 1                                                                   | 0.22  | -1.000 |
| Ugcg          | 22234  | UDP-glucose ceramide glucosyltransferase                                                             | 0.24  | -1.000 |
| C030044B11Rik | 68128  | RIKEN cDNA C030044B11 gene                                                                           | 0.25  | -1.000 |
| Rtn4r1        | 237847 | reticulin 4 receptor-like 1                                                                          | 0.25  | -1.000 |
| Rasgrp2       | 19395  | RAS, guanyl releasing protein 2                                                                      | 0.26  | -1.000 |
| Ggt1          | 14598  | gamma-glutamyltransferase 1                                                                          | 0.28  | -1.000 |
| 1190002H23Rik | 66214  | RIKEN cDNA 1190002H23 gene                                                                           | 0.31  | -1.000 |
| D730035F11Rik | 320010 | RIKEN cDNA D730035F11 gene                                                                           | 0.33  | -1.000 |
| Scml4         | 268297 | sex comb on midleg-like 4 (Drosophila)                                                               | 0.34  | -1.000 |
| Slc12a7       | 20499  | solute carrier family 12, member 7                                                                   | 0.39  | -1.000 |
| E430014B02Rik | 320908 | RIKEN cDNA E430014B02 gene                                                                           | 0.46  | -1.000 |
| Satb1         | 20230  | Special AT-rich sequence binding protein 1                                                           | 0.59  | -1.000 |
| E430004N04Rik | 210757 | RIKEN cDNA E430004N04 gene                                                                           | 0.72  | -1.000 |
| Atp1b1        | 11931  | ATPase, Na <sup>+</sup> /K <sup>+</sup> transporting, beta 1 polypeptide                             | 0.98  | -1.000 |
| F2r1          | 14063  | coagulation factor II (thrombin) receptor-like 1                                                     | -0.54 | -1.322 |
| Snn           | 20621  | stannin                                                                                              | -0.5  | -1.322 |
| Ppic          | 19038  | peptidylprolyl isomerase C                                                                           | -0.21 | -1.322 |
| Klhdc1        | 271005 | kelch domain containing 1                                                                            | -0.06 | -1.322 |
| Gpr97         | 54672  | G protein-coupled receptor 97                                                                        | -0.05 | -1.322 |
| Ccl5          | 20304  | chemokine (C-C motif) ligand 5                                                                       | -0.04 | -1.322 |
| Phxr4         | 18689  | per-hexamer repeat gene 4                                                                            | -0.03 | -1.322 |
| Tmem23        | 208449 | transmembrane protein 23                                                                             | 0.03  | -1.322 |
| Cyp2s1        | 74134  | cytochrome P450, family 2, subfamily s, polypeptide 1                                                | 0.09  | -1.322 |
| Ibtk          | 108837 | inhibitor of Bruton agammaglobulinemia tyrosine kinase                                               | 0.14  | -1.322 |
| Adh1          | 11522  | alcohol dehydrogenase 1 (class I)                                                                    | 0.18  | -1.322 |
| Tcf7          | 21414  | transcription factor 7, T-cell specific                                                              | 0.38  | -1.322 |
| Chd7          | 320790 | chromodomain helicase DNA binding protein 7                                                          | 0.43  | -1.322 |
| Emb           | 13723  | embigin                                                                                              | 0.53  | -1.322 |
| A130092J06Rik | 241303 | RIKEN cDNA A130092J06 gene                                                                           | 0.83  | -1.322 |
| Pole2         | 18974  | polymerase (DNA directed), epsilon 2 (p59 subunit)                                                   | -0.56 | -1.737 |
| Itgb3         | 16416  | integrin beta 3                                                                                      | -0.16 | -1.737 |
| Lair1         | 52855  | leukocyte-associated Ig-like receptor 1                                                              | -0.05 | -1.737 |
| Btbd14a       | 67991  | BTB (POZ) domain containing 14A                                                                      | 0.01  | -1.737 |
| Acpl2         | 235534 | acid phosphatase-like 2                                                                              | 0.02  | -1.737 |
| Wwox          | 80707  | WW domain-containing oxidoreductase                                                                  | 0.1   | -1.737 |
| Myo10         | 17909  | Myosin X                                                                                             | 0.1   | -1.737 |
| Sema4f        | 20355  | sema domain, immunoglobulin domain (Ig), TM domain, and short cytoplasmic domain                     | 0.11  | -1.737 |
| Enc1          | 13803  | ectodermal-neural cortex 1                                                                           | 0.15  | -1.737 |
| Ntrk3         | 18213  | Neurotrophic tyrosine kinase, receptor, type 3                                                       | 0.25  | -1.737 |
| 2810001G20Rik | 66456  | RIKEN cDNA 2810001G20 gene                                                                           | 0.27  | -1.737 |

Table S4A

|               |        |                                                                       |       |        |
|---------------|--------|-----------------------------------------------------------------------|-------|--------|
| Rgmb          | 68799  | RGM domain family, member B                                           | 0.3   | -1.737 |
| Tgfb3         | 21814  | transforming growth factor, beta receptor III                         | 0.31  | -1.737 |
| Acpp          | 56318  | acid phosphatase, prostate                                            | 0.42  | -1.737 |
| Cnga1         | 12788  | cyclic nucleotide gated channel alpha 1                               | 0.42  | -1.737 |
| 2010004M13Rik | 76511  | RIKEN cDNA 2010004M13 gene                                            | 0.46  | -1.737 |
| Klhl5         | 71778  | kelch-like 5 (Drosophila)                                             | 0.51  | -1.737 |
| Igfbp4        | 16010  | insulin-like growth factor binding protein 4                          | 0.93  | -1.737 |
| Pou2af1       | 18985  | POU domain, class 2, associating factor 1                             | -0.43 | -2.322 |
| Hs3st3b1      | 54710  | heparan sulfate (glucosamine) 3-O-sulfotransferase 3B1                | -0.04 | -2.322 |
| Epas1         | 13819  | Endothelial PAS domain protein 1                                      | 0.03  | -2.322 |
| Dip3b         | 216190 | Dip3 beta                                                             | 0.11  | -2.322 |
| Sgk           | 20393  | serum/glucocorticoid regulated kinase                                 | 0.3   | -2.322 |
| 2610019F03Rik | 72148  | RIKEN cDNA 2610019F03 gene                                            | 0.67  | -2.322 |
| Slc16a5       | 217316 | solute carrier family 16 (monocarboxylic acid transporters), member 5 | 0.95  | -2.322 |
| 2310010M24Rik | 71897  | RIKEN cDNA 2310010M24 gene                                            | -0.1  | -3.322 |
| Klrd1         | 16643  | killer cell lectin-like receptor, subfamily D, member 1               | -0.06 | -3.322 |
| AI646023      | 192734 | expressed sequence AI646023                                           | -0.02 | -3.322 |
| Il1rl2        | 107527 | interleukin 1 receptor-like 2                                         | 0.07  | -3.322 |
| Atp8b4        | 241633 | ATPase, class I, type 8B, member 4                                    | 0.1   | -3.322 |
| App           | 11820  | amyloid beta (A4) precursor protein                                   | 0.14  | -3.322 |
| Pde3b         | 18576  | phosphodiesterase 3B, cGMP-inhibited                                  | 0.24  | -3.322 |
| Rapgef4       | 56508  | Rap guanine nucleotide exchange factor (GEF) 4                        | 0.37  | -3.322 |
| Pdlim4        | 30794  | PDZ and LIM domain 4                                                  | 0.81  | -3.322 |
| 2310032F03Rik | 76747  | RIKEN cDNA 2310032F03 gene                                            | 0.96  | -3.322 |

Table S4 B

| Symbol        | Gene ID | Description                                                              | Treg Lck fold change (log <sub>2</sub> ) | Treg/Tconv signature (log <sub>2</sub> ) |
|---------------|---------|--------------------------------------------------------------------------|------------------------------------------|------------------------------------------|
| Dusp4         | 319520  | dual specificity phosphatase 4                                           | -1.3                                     | 3.621                                    |
| 4631408O11Rik | 66693   | RIKEN cDNA 4631408O11 gene                                               | -0.79                                    | 3.392                                    |
| Ctla4         | 12477   | cytotoxic T-lymphocyte-associated protein 4                              | -0.62                                    | 3.202                                    |
| Zfpn1a2       | 22779   | zinc finger protein, subfamily 1A, 2 (Helios)                            | -0.79                                    | 2.848                                    |
| Nrp1          | 18186   | neuropilin 1                                                             | -0.83                                    | 2.807                                    |
| Tiam1         | 21844   | T-cell lymphoma invasion and metastasis 1                                | -1.1                                     | 2.766                                    |
| Hmgn3         | 94353   | high mobility group nucleosomal binding domain 3                         | -1.05                                    | 2.678                                    |
| Ilgae         | 16407   | integrin, alpha E, epithelial-associated                                 | -0.9                                     | 2.609                                    |
| Ptger2        | 19217   | prostaglandin E receptor 2 (subtype EP2)                                 | -1.06                                    | 2.511                                    |
| Sh3bgrl2      | 212531  | SH3 domain binding glutamic acid-rich protein like 2                     | 0.99                                     | 2.459                                    |
| Tnfrsf4       | 22163   | tumor necrosis factor receptor superfamily, member 4                     | -1.47                                    | 2.406                                    |
| Mbnl3         | 171170  | muscleblind-like 3 (Drosophila)                                          | -0.68                                    | 2.406                                    |
| 1110032F04Rik | 68725   | RIKEN cDNA 1110032F04 gene                                               | -0.83                                    | 2.350                                    |
| Arhgap20      | 244867  | Rho GTPase activating protein 20                                         | -0.7                                     | 2.350                                    |
| Serpina3g     | 20715   | serine (or cysteine) peptidase inhibitor, clade A, member 3G             | -0.86                                    | 2.233                                    |
| 5830456J23Rik | 76105   | RIKEN cDNA 5830456J23 gene                                               | -0.59                                    | 2.104                                    |
| Rabgap11      | 29809   | RAB GTPase activating protein 1-like                                     | -0.69                                    | 2.000                                    |
| Spry1         | 24063   | sprouty homolog 1 (Drosophila)                                           | -0.59                                    | 2.000                                    |
| Cd200         | 17470   | Cd200 antigen                                                            | -0.98                                    | 1.926                                    |
| Cd83          | 12522   | CD83 antigen                                                             | -1.81                                    | 1.848                                    |
| Eno3          | 13808   | enolase 3, beta muscle                                                   | -0.89                                    | 1.807                                    |
| Bhlhb2        | 20893   | basic helix-loop-helix domain containing, class B2                       | -0.76                                    | 1.807                                    |
| Nt5e          | 23959   | 5' nucleotidase, ecto                                                    | -0.87                                    | 1.766                                    |
| Ndg2          | 103172  | Nur77 downstream gene 2                                                  | -0.82                                    | 1.766                                    |
| Rcn1          | 19672   | reticulocalbin 1                                                         | 0.67                                     | 1.766                                    |
| Hivep3        | 16656   | human immunodeficiency virus type 1 enhancer binding protein 3           | -0.77                                    | 1.722                                    |
| Swap70        | 20947   | SWA-70 protein                                                           | -0.89                                    | 1.678                                    |
| Capn3         | 12335   | calpain 3                                                                | -0.59                                    | 1.678                                    |
| Phtf2         | 68770   | Putative homeodomain transcription factor 2                              | -0.59                                    | 1.585                                    |
| Stx11         | 74732   | syntaxin 11                                                              | -0.83                                    | 1.536                                    |
| Cd81          | 12520   | CD 81 antigen                                                            | -0.73                                    | 1.536                                    |
| Gsto1         | 14873   | glutathione S-transferase omega 1                                        | -1.22                                    | 1.485                                    |
| Ccr6          | 12458   | chemokine (C-C motif) receptor 6                                         | -0.78                                    | 1.485                                    |
| Sh3gl3        | 20408   | SH3-domain GRB2-like 3                                                   | -0.9                                     | 1.433                                    |
| Cyfp1         | 20430   | cytoplasmic FMR1 interacting protein 1                                   | -0.88                                    | 1.433                                    |
| Tnfrsf9       | 21942   | tumor necrosis factor receptor superfamily, member 9                     | -1.21                                    | 1.379                                    |
| Tnfrsf1b      | 21938   | tumor necrosis factor receptor superfamily, member 1b                    | -0.66                                    | 1.379                                    |
| C80638        | 97086   | expressed sequence C80638                                                | -1.36                                    | 1.322                                    |
| Tnfrsf11      | 21943   | tumor necrosis factor (ligand) superfamily, member 11                    | -1.19                                    | 1.263                                    |
| Penk1         | 18619   | preproenkephalin 1                                                       | -0.9                                     | 1.263                                    |
| Zfp52         | 22710   | zinc finger protein 52                                                   | -0.67                                    | 1.263                                    |
| Nrn1          | 68404   | neurexin 1                                                               | -1.4                                     | 1.138                                    |
| Samsn1        | 67742   | SAM domain, SH3 domain and nuclear localization signals, 1               | -1.1                                     | 1.138                                    |
| Trpm1         | 17364   | transient receptor potential cation channel, subfamily M, member 1       | -0.69                                    | 1.138                                    |
| Ndrp1         | 17988   | N-myc downstream regulated gene 1                                        | -0.61                                    | 1.138                                    |
| C030046G05    | 327885  | hypothetical protein C030046G05                                          | -1.03                                    | 1.070                                    |
| Inpp5f        | 101490  | inositol polyphosphate-5-phosphatase F                                   | -0.78                                    | 1.070                                    |
| Osbpl3        | 71720   | oxysterol binding protein-like 3                                         | -0.66                                    | 1.070                                    |
| A530052I06Rik | 99953   | RIKEN cDNA A530052I06 gene                                               | -0.62                                    | 1.070                                    |
| Ptprs         | 19280   | protein tyrosine phosphatase, receptor type, S                           | -0.95                                    | 1.000                                    |
| Alcam         | 11658   | activated leukocyte cell adhesion molecule                               | -0.92                                    | 1.000                                    |
| Nr4a2         | 18227   | Nuclear receptor subfamily 4, group A, member 2                          | -0.69                                    | 1.000                                    |
| Sh3bgrl       | 56726   | SH3-binding domain glutamic acid-rich protein like                       | -0.63                                    | 0.926                                    |
| Egr2          | 13654   | early growth response 2                                                  | -1.45                                    | 0.848                                    |
| Ephx1         | 13849   | epoxide hydrolase 1, microsomal                                          | -0.96                                    | 0.848                                    |
| Tank          | 21353   | TRAF family member-associated Nf-kappa B activator                       | -0.7                                     | 0.848                                    |
| Cst7          | 13011   | cystatin F (leukocystatin)                                               | -0.78                                    | 0.678                                    |
| 4732460K03Rik | 58894   | RIKEN cDNA 4732460K03 gene                                               | -0.77                                    | 0.678                                    |
| Irf4          | 16364   | interferon regulatory factor 4                                           | -1.02                                    | 0.585                                    |
| Twsg1         | 65960   | twisted gastrulation homolog 1 (Drosophila)                              | -0.86                                    | 0.585                                    |
| E130308A19Rik | 230259  | RIKEN cDNA E130308A19 gene                                               | -0.71                                    | 0.585                                    |
| C030002B11Rik | 78540   | RIKEN cDNA C030002B11 gene                                               | 0.61                                     | -0.737                                   |
| Pdk1          | 228026  | pyruvate dehydrogenase kinase, isoenzyme 1                               | 0.67                                     | -0.737                                   |
| Dntt          | 21673   | deoxynucleotidyltransferase, terminal                                    | 0.83                                     | -0.737                                   |
| 5830431A10Rik | 76024   | RIKEN cDNA 5830431A10 gene                                               | 0.88                                     | -0.737                                   |
| 1500005K14Rik | 76566   | RIKEN cDNA 1500005K14 gene                                               | 1.14                                     | -0.737                                   |
| Satb1         | 20230   | Special AT-rich sequence binding protein 1                               | 0.59                                     | -1.000                                   |
| E430004N04Rik | 210757  | RIKEN cDNA E430004N04 gene                                               | 0.72                                     | -1.000                                   |
| Atp1b1        | 11931   | ATPase, Na <sup>+</sup> /K <sup>+</sup> transporting, beta 1 polypeptide | 0.98                                     | -1.000                                   |
| A130092J06Rik | 241303  | RIKEN cDNA A130092J06 gene                                               | 0.83                                     | -1.322                                   |
| Igfbp4        | 16010   | insulin-like growth factor binding protein 4                             | 0.93                                     | -1.737                                   |
| 2610019F03Rik | 72148   | RIKEN cDNA 2610019F03 gene                                               | 0.67                                     | -2.322                                   |
| Slc16a5       | 217316  | solute carrier family 16 (monocarboxylic acid transporters), member 5    | 0.95                                     | -2.322                                   |
| Pdlim4        | 30794   | PDZ and LIM domain 4                                                     | 0.81                                     | -3.322                                   |
| 2310032F03Rik | 76747   | RIKEN cDNA 2310032F03 gene                                               | 0.96                                     | -3.322                                   |
